# Supplementary material for: MS_HistoneDB, a manually curated resource for proteomic analysis of human and mouse histones
Source: PubMed Central journal article supplement (PMC5223428; doi:10.1186/s13072-016-0109-x), 2017-01-10
Supplement: 13072_2016_109_MOESM3_ESM.pdf [file 13072_2016_109_MOESM3_ESM.pdf]

## SUPPLEMENTARY DATA

**Figure S3. MS/MS spectra assigned to peptides of H2A and H2B variants with an uncertain protein annotation state in UniProt/ NCBI.**

The tables contain the masses of the fragment ions expected to be produced by fragmentation of the peptide assigned to the MS/MS spectrum. In red bold font are highlighted the masses that were indeed detected in the experimental spectrum. The classically considered fragment ions of (b, y, b0 = b-H<sub>2</sub>O, y0 = y-H<sub>2</sub>O, b\* = b-NH<sub>3</sub> and y\* = y-NH<sub>3</sub>) types were taken into account to interpret the MS/MS spectra produced on the LTQ-Orbitrap instrument and for a first step of interpretation of the Q-Exactive data. For the latter data (HCD fragmentation mode), a (i.e. b – CO) and z (i.e. y-NH<sub>3</sub>) ions were considered instead of b\* and y\* ones and low-mass immonium ions were added to confirm the presence of some specific amino acids in the sequence. Finally, internal fragments devoid of the original N- and C-termini of the peptide were considered: they have been described to be significantly produced by HCD fragmentation and can sometimes allow interpreting quite intense experimental fragments ([dx.doi.org/10.1021/pr3007045](https://doi.org/10.1021/pr3007045) | J. Proteome Res. 2012, 11, 5479–5491).

H2A.L.1 (H2A.Lap2; Gene: *H2a1a, GH2a1c, H2a1d, H2a1f, H2a1g, H2a1h, H2a1i*): **GELPFSLVDR**

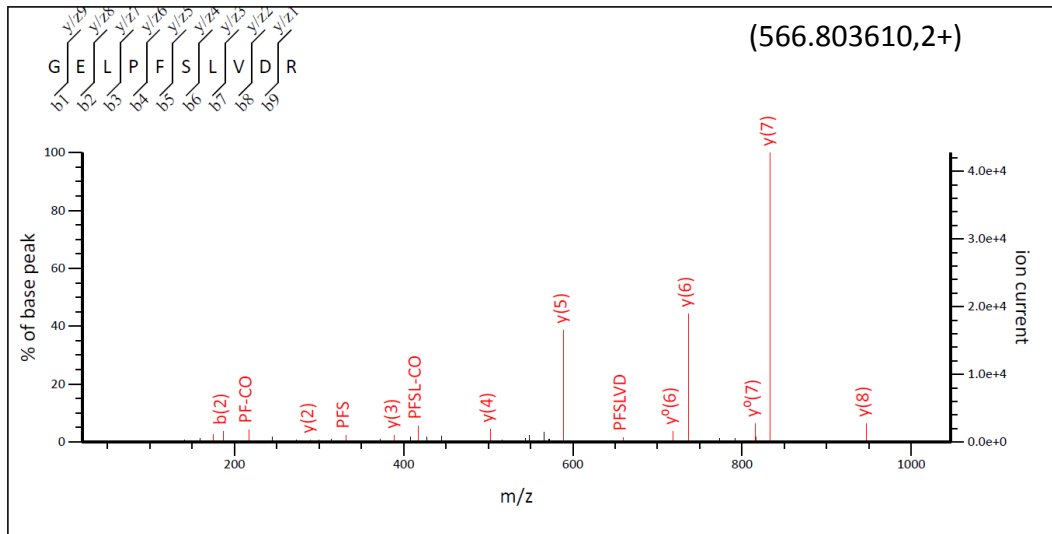

**Monoisotopic mass of neutral peptide Mr(calc):** 1131.5924  
**Fixed modifications:** Carbamidomethyl (C) (apply to specified residues or termini only)  
**Ions Score:** 76 **Expect:** 3.7e-06  
**Matches :** 21/164 fragment ions using 22 most intense peaks ([help](#))

| #  | Immon.   | a        | a <sup>++</sup> | b               | b <sup>++</sup> | b <sup>0</sup> | b <sup>0++</sup> | Seq. | y               | y <sup>++</sup> | y <sup>0</sup>  | y <sup>0++</sup> | z               | z <sup>++</sup> | #  |
|----|----------|----------|-----------------|-----------------|-----------------|----------------|------------------|------|-----------------|-----------------|-----------------|------------------|-----------------|-----------------|----|
| 1  | 30.0338  | 30.0338  | 15.5206         | 58.0287         | 29.5180         |                |                  | G    |                 |                 |                 |                  |                 |                 | 10 |
| 2  | 102.0550 | 159.0764 | 80.0418         | <b>187.0713</b> | 94.0393         | 169.0608       | 85.0340          | E    | 1075.5782       | 538.2928        | 1057.5677       | 529.2875         | 1058.5517       | 529.7795        | 9  |
| 3  | 86.0964  | 272.1605 | 136.5839        | 300.1554        | 150.5813        | 282.1448       | 141.5761         | L    | <b>946.5356</b> | 473.7715        | 928.5251        | 464.7662         | 929.5091        | 465.2582        | 8  |
| 4  | 70.0651  | 369.2132 | 185.1103        | 397.2082        | 199.1077        | 379.1976       | 190.1024         | P    | <b>833.4516</b> | <b>417.2294</b> | <b>815.4410</b> | 408.2241         | <b>816.4250</b> | 408.7162        | 7  |
| 5  | 120.0808 | 516.2817 | 258.6445        | 544.2766        | 272.6419        | 526.2660       | 263.6366         | F    | <b>736.3988</b> | 368.7030        | <b>718.3882</b> | 359.6978         | 719.3723        | 360.1898        | 6  |
| 6  | 60.0444  | 603.3137 | 302.1605        | 631.3086        | 316.1579        | 613.2980       | 307.1527         | S    | <b>589.3304</b> | 295.1688        | 571.3198        | 286.1636         | 572.3039        | 286.6556        | 5  |
| 7  | 86.0964  | 716.3978 | 358.7025        | 744.3927        | 372.7000        | 726.3821       | 363.6947         | L    | <b>502.2984</b> | 251.6528        | 484.2878        | 242.6475         | 485.2718        | 243.1395        | 4  |
| 8  | 72.0808  | 815.4662 | 408.2367        | 843.4611        | 422.2342        | 825.4505       | 413.2289         | V    | <b>389.2143</b> | 195.1108        | 371.2037        | 186.1055         | 372.1878        | 186.5975        | 3  |
| 9  | 88.0393  | 930.4931 | 465.7502        | 958.4880        | 479.7476        | 940.4775       | 470.7424         | D    | <b>290.1459</b> | 145.5766        | 272.1353        | 136.5713         | 273.1193        | 137.0633        | 2  |
| 10 | 129.1135 |          |                 |                 |                 |                |                  | R    | <b>175.1190</b> | 88.0631         |                 |                  | 158.0924        | 79.5498         | 1  |

| Seq    | ya              | yb              | Seq    | ya              | yb              | Seq    | ya       | yb              |
|--------|-----------------|-----------------|--------|-----------------|-----------------|--------|----------|-----------------|
| EL     | 215.1390        | 243.1339        | ELP    | 312.1918        | 340.1867        | ELPF   | 459.2602 | 487.2551        |
| ELPFS  | 546.2922        | 574.2871        | ELPFSL | 659.3763        | 687.3712        | LP     | 183.1492 | 211.1441        |
| LPF    | 330.2176        | 358.2125        | LPFS   | <b>417.2496</b> | <b>445.2445</b> | LPFSL  | 530.3337 | 558.3286        |
| LPFSLV | 629.4021        | 657.3970        | PF     | <b>217.1335</b> | <b>245.1285</b> | PFS    | 304.1656 | <b>332.1605</b> |
| PFSL   | <b>417.2496</b> | <b>445.2445</b> | PFSLV  | 516.3180        | 544.3130        | PFSLVD | 631.3450 | <b>659.3399</b> |
| FS     | 207.1128        | 235.1077        | FSL    | 320.1969        | 348.1918        | FSLV   | 419.2653 | 447.2602        |
| FSLVD  | 534.2922        | 562.2871        | SL     | 173.1285        | 201.1234        | SLV    | 272.1969 | 300.1918        |
| SLVD   | 387.2238        | 415.2187        | LV     | 185.1648        | 213.1598        | LVD    | 300.1918 | 328.1867        |
| VD     | 187.1077        | 215.1026        |        |                 |                 |        |          |                 |

## H2A.L.1 (Gene: *H2alb*): IAPEDVHLVVQNNEQLR

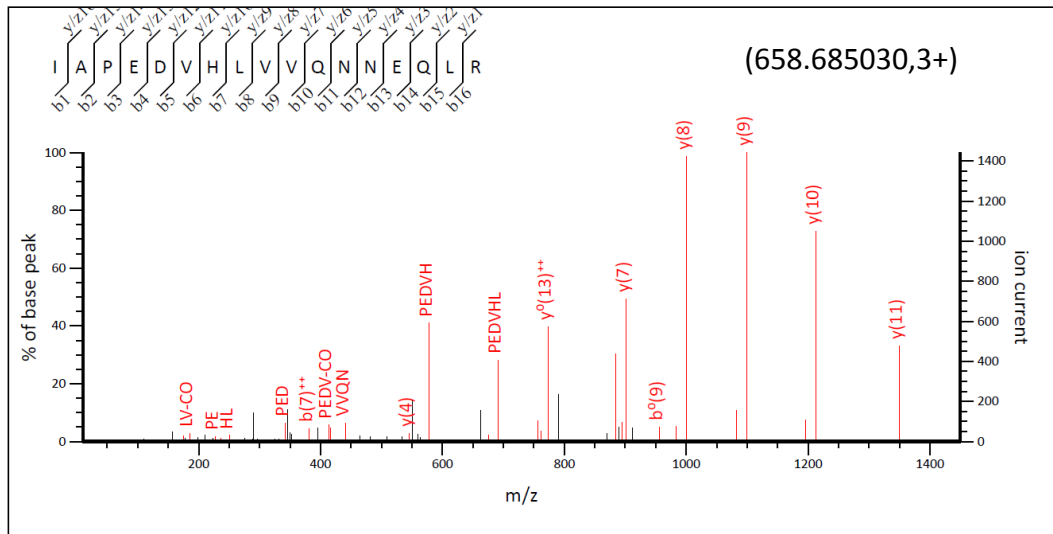

Monoisotopic mass of neutral peptide Mr(calc): 1973.0330  
 Fixed modifications: Carbamidomethyl (C) (apply to specified residues or termini only)  
 Ions Score: 65 Expect: 3.9e-06  
 Matches : 33/315 fragment ions using 40 most intense peaks ([help](#))

| #  | Immon.   | a         | a <sup>++</sup> | b               | b <sup>++</sup> | b <sup>0</sup>  | b <sup>0++</sup> | Seq. | y                | y <sup>++</sup> | y <sup>0</sup> | y <sup>0++</sup> | z                | z <sup>++</sup> | #  |
|----|----------|-----------|-----------------|-----------------|-----------------|-----------------|------------------|------|------------------|-----------------|----------------|------------------|------------------|-----------------|----|
| 1  | 86.0964  | 86.0964   | 43.5519         | 114.0913        | 57.5493         |                 |                  | I    |                  |                 |                |                  |                  |                 | 17 |
| 2  | 44.0495  | 157.1335  | 79.0704         | <b>185.1285</b> | 93.0679         |                 |                  | A    | 1860.9563        | 930.9818        | 1842.9457      | 921.9765         | 1843.9297        | 922.4685        | 16 |
| 3  | 70.0651  | 254.1863  | 127.5968        | 282.1812        | 141.5942        |                 |                  | P    | 1789.9191        | <b>895.4632</b> | 1771.9086      | 886.4579         | 1772.8926        | 886.9499        | 15 |
| 4  | 102.0550 | 383.2289  | 192.1181        | 411.2238        | 206.1155        | 393.2132        | 197.1103         | E    | 1692.8664        | 846.9368        | 1674.8558      | 837.9315         | 1675.8398        | 838.4236        | 14 |
| 5  | 88.0393  | 498.2558  | 249.6316        | 526.2508        | 263.6290        | 508.2402        | 254.6237         | D    | 1563.8238        | 782.4155        | 1545.8132      | <b>773.4102</b>  | 1546.7972        | 773.9023        | 13 |
| 6  | 72.0808  | 597.3243  | 299.1658        | 625.3192        | 313.1632        | 607.3086        | 304.1579         | V    | 1448.7968        | 724.9021        | 1430.7863      | 715.8968         | 1431.7703        | 716.3888        | 12 |
| 7  | 110.0713 | 734.3832  | 367.6952        | <b>762.3781</b> | <b>381.6927</b> | 744.3675        | 372.6874         | H    | <b>1349.7284</b> | <b>675.3678</b> | 1331.7179      | 666.3626         | 1332.7019        | 666.8546        | 11 |
| 8  | 86.0964  | 847.4672  | 424.2373        | 875.4621        | 438.2347        | 857.4516        | 429.2294         | L    | <b>1212.6695</b> | 606.8384        | 1194.6589      | 597.8331         | <b>1195.6430</b> | 598.3251        | 10 |
| 9  | 72.0808  | 946.5356  | 473.7715        | 974.5306        | 487.7689        | <b>956.5200</b> | 478.7636         | V    | <b>1099.5854</b> | 550.2964        | 1081.5749      | 541.2911         | <b>1082.5589</b> | 541.7831        | 9  |
| 10 | 72.0808  | 1045.6041 | 523.3057        | 1073.5990       | 537.3031        | 1055.5884       | 528.2978         | V    | <b>1000.5170</b> | 500.7622        | 982.5065       | 491.7569         | <b>983.4905</b>  | 492.2489        | 8  |
| 11 | 101.0709 | 1173.6626 | 587.3350        | 1201.6576       | 601.3324        | 1183.6470       | 592.3271         | Q    | <b>901.4486</b>  | 451.2279        | 883.4381       | 442.2227         | <b>884.4221</b>  | 442.7147        | 7  |
| 12 | 87.0553  | 1287.7056 | 644.3564        | 1315.7005       | 658.3539        | 1297.6899       | 649.3486         | N    | <b>773.3900</b>  | 387.1987        | 755.3795       | 378.1934         | <b>756.3635</b>  | 378.6854        | 6  |
| 13 | 87.0553  | 1401.7485 | 701.3779        | 1429.7434       | 715.3753        | 1411.7328       | 706.3701         | N    | 659.3471         | 330.1772        | 641.3365       | 321.1719         | 642.3206         | 321.6639        | 5  |
| 14 | 102.0550 | 1530.7911 | 765.8992        | 1558.7860       | 779.8966        | 1540.7754       | 770.8914         | E    | <b>545.3042</b>  | 273.1557        | 527.2936       | 264.1504         | 528.2776         | 264.6425        | 4  |
| 15 | 101.0709 | 1658.8497 | 829.9285        | 1686.8446       | 843.9259        | 1668.8340       | 834.9206         | Q    | <b>416.2616</b>  | 208.6344        |                |                  | 399.2350         | 200.1212        | 3  |
| 16 | 86.0964  | 1771.9337 | 886.4705        | 1799.9286       | 900.4680        | 1781.9181       | 891.4627         | L    | 288.2030         | 144.6051        |                |                  | 271.1765         | 136.0919        | 2  |
| 17 | 129.1135 |           |                 |                 |                 |                 |                  | R    | <b>175.1190</b>  | 88.0631         |                |                  | 158.0924         | 79.5498         | 1  |

| Seq    | ya              | yb              | Seq    | ya              | yb              | Seq    | ya              | yb              |
|--------|-----------------|-----------------|--------|-----------------|-----------------|--------|-----------------|-----------------|
| AP     | 141.1022        | 169.0972        | APE    | 270.1448        | 298.1397        | APED   | 385.1718        | 413.1667        |
| APEDV  | 484.2402        | 512.2351        | APEDVH | 621.2991        | 649.2940        | PE     | 199.1077        | <b>227.1026</b> |
| PED    | 314.1347        | <b>342.1296</b> | PEDV   | <b>413.2031</b> | <b>441.1980</b> | PEDVH  | <b>550.2620</b> | <b>578.2569</b> |
| PEDVHL | <b>663.3461</b> | <b>691.3410</b> | ED     | 217.0819        | 245.0768        | EDV    | 316.1503        | 344.1452        |
| EDVH   | 453.2092        | 481.2041        | EDVHL  | 566.2933        | 594.2882        | EDVHLV | 665.3617        | 693.3566        |
| DV     | 187.1077        | 215.1026        | DVH    | 324.1666        | 352.1615        | DVHL   | 437.2507        | 465.2456        |
| DVHLV  | 536.3191        | 564.3140        | DVHLVV | 635.3875        | 663.3824        | VH     | 209.1397        | <b>237.1346</b> |
| VHL    | 322.2238        | 350.2187        | VHLV   | 421.2922        | 449.2871        | VHLVV  | 520.3606        | 548.3555        |
| VHLVVQ | 648.4192        | 676.4141        | HL     | 223.1553        | <b>251.1503</b> | HLV    | 322.2238        | 350.2187        |
| HLVV   | 421.2922        | 449.2871        | HLVVQ  | 549.3507        | 577.3457        | HLVVQN | 663.3937        | 691.3886        |
| LV     | <b>185.1648</b> | 213.1598        | LVV    | 284.2333        | 312.2282        | LVVQ   | 412.2918        | 440.2867        |
| LVVQN  | 526.3348        | 554.3297        | LVVQNN | 640.3777        | 668.3726        | VV     | 171.1492        | 199.1441        |
| VVQ    | 299.2078        | 327.2027        | VVQN   | 413.2507        | <b>441.2456</b> | VVQNN  | 527.2936        | 555.2885        |

H2A.L.1 (Gene :H2a1n): **FLREEIHSSR**

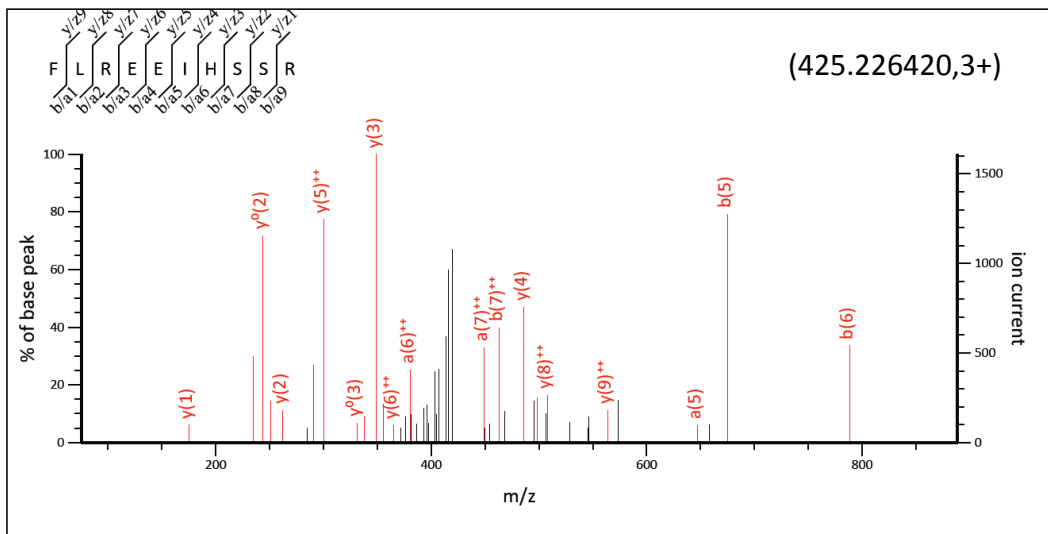

Monoisotopic mass of neutral peptide Mr(calc): 1272.6575  
 Fixed modifications: Carbamidomethyl (C) (apply to specified residues or termini only)  
 Ions Score: 41 Expect: 0.015  
 Matches : 33/156 fragment ions using 30 most intense peaks ([help](#))

| #  | Immon.   | a               | a <sup>++</sup> | b               | b <sup>++</sup> | b <sup>0</sup> | b <sup>0++</sup> | Seq. | y               | y <sup>++</sup> | y <sup>0</sup>  | y <sup>0++</sup> | z         | z <sup>++</sup> | #  |
|----|----------|-----------------|-----------------|-----------------|-----------------|----------------|------------------|------|-----------------|-----------------|-----------------|------------------|-----------|-----------------|----|
| 1  | 120.0808 | 120.0808        | 60.5440         | 148.0757        | 74.5415         |                |                  | F    |                 |                 |                 |                  |           |                 | 10 |
| 2  | 86.0964  | 233.1648        | 117.0861        | 261.1598        | 131.0835        |                |                  | L    | 1126.5963       | <b>563.8018</b> | 1108.5858       | 554.7965         | 1109.5698 | 555.2885        | 9  |
| 3  | 129.1135 | 389.2659        | 195.1366        | 417.2609        | 209.1341        |                |                  | R    | 1013.5123       | <b>507.2598</b> | 995.5017        | <b>498.2545</b>  | 996.4857  | <b>498.7465</b> | 8  |
| 4  | 102.0550 | 518.3085        | 259.6579        | 546.3035        | 273.6554        | 528.2929       | 264.6501         | E    | 857.4112        | 429.2092        | 839.4006        | 420.2039         | 840.3846  | 420.6959        | 7  |
| 5  | 102.0550 | <b>647.3511</b> | 324.1792        | <b>675.3461</b> | <b>338.1767</b> | 657.3355       | 329.1714         | E    | 728.3686        | <b>364.6879</b> | 710.3580        | <b>355.6826</b>  | 711.3420  | <b>356.1747</b> | 6  |
| 6  | 86.0964  | 760.4352        | <b>380.7212</b> | <b>788.4301</b> | 394.7187        | 770.4196       | 385.7134         | I    | 599.3260        | <b>300.1666</b> | 581.3154        | <b>291.1613</b>  | 582.2994  | <b>291.6534</b> | 5  |
| 7  | 110.0713 | 897.4941        | <b>449.2507</b> | 925.4890        | <b>463.2482</b> | 907.4785       | 454.2429         | H    | <b>486.2419</b> | <b>243.6246</b> | 468.2314        | <b>234.6193</b>  | 469.2154  | <b>235.1113</b> | 4  |
| 8  | 60.0444  | 984.5261        | 492.7667        | 1012.5211       | <b>506.7642</b> | 994.5105       | <b>497.7589</b>  | S    | <b>349.1830</b> | <b>175.0951</b> | <b>331.1724</b> | 166.0899         | 332.1565  | 166.5819        | 3  |
| 9  | 60.0444  | 1071.5582       | 536.2827        | 1099.5531       | 550.2802        | 1081.5425      | 541.2749         | S    | <b>262.1510</b> | 131.5791        | <b>244.1404</b> | 122.5738         | 245.1244  | 123.0659        | 2  |
| 10 | 129.1135 |                 |                 |                 |                 |                |                  | R    | <b>175.1190</b> | 88.0631         |                 |                  | 158.0924  | 79.5498         | 1  |

| Seq    | ya       | yb              | Seq   | ya       | yb              | Seq   | ya       | yb              |
|--------|----------|-----------------|-------|----------|-----------------|-------|----------|-----------------|
| LR     | 242.1975 | 270.1925        | LRE   | 371.2401 | 399.2350        | LREE  | 500.2827 | 528.2776        |
| LREEI  | 613.3668 | 641.3617        | RE    | 258.1561 | 286.1510        | REE   | 387.1987 | 415.1936        |
| REEI   | 500.2827 | 528.2776        | REEIH | 637.3416 | 665.3365        | EE    | 231.0975 | 259.0925        |
| EI     | 344.1816 | 372.1765        | EEIH  | 481.2405 | 509.2354        | EEIHS | 568.2726 | 596.2675        |
| EEIHSS | 655.3046 | 683.2995        | EI    | 215.1390 | 243.1339        | EIH   | 352.1979 | <b>380.1928</b> |
| EIHS   | 439.2300 | 467.2249        | EIHSS | 526.2620 | 554.2569        | IH    | 223.1553 | <b>251.1503</b> |
| IHS    | 310.1874 | <b>338.1823</b> | IHSS  | 397.2194 | 425.2143        | HS    | 197.1033 | 225.0982        |
| HSS    | 284.1353 | 312.1302        | SS    | 147.0764 | <b>175.0713</b> |       |          |                 |

## H2A.L.1 (Gene : *H2a1n*): SGGTSVNEPPEPDDN

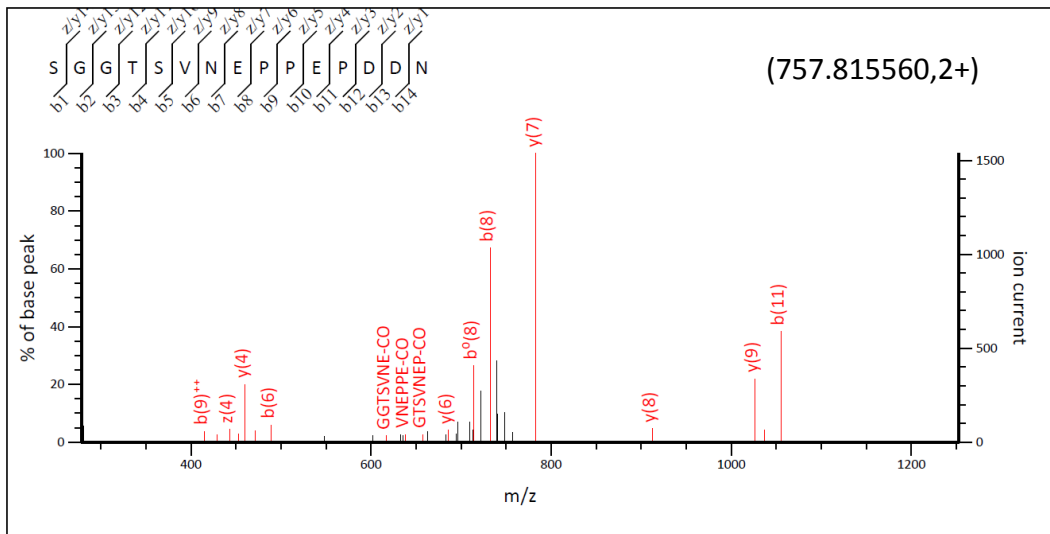

Monoisotopic mass of neutral peptide  $M_r(\text{calc})$ : 1513.6169  
 Fixed modifications: Carbamidomethyl (C) (apply to specified residues or termini only)  
 Ions Score: 28 Expect: 0.0073  
 Matches : 21/286 fragment ions using 31 most intense peaks ([help](#))

| #  | Immon.   | a         | a <sup>++</sup> | b         | b <sup>++</sup> | b <sup>0</sup> | b <sup>0++</sup> | Seq. | y         | y <sup>++</sup> | y <sup>0</sup> | y <sup>0++</sup> | z         | z <sup>++</sup> | #  |
|----|----------|-----------|-----------------|-----------|-----------------|----------------|------------------|------|-----------|-----------------|----------------|------------------|-----------|-----------------|----|
| 1  | 60.0444  | 60.0444   | 30.5258         | 88.0393   | 44.5233         | 70.0287        | 35.5180          | S    |           |                 |                |                  |           |                 | 15 |
| 2  | 30.0338  | 117.0659  | 59.0366         | 145.0608  | 73.0340         | 127.0502       | 64.0287          | G    | 1427.5921 | 714.2997        | 1409.5815      | 705.2944         | 1410.5656 | 705.7864        | 14 |
| 3  | 30.0338  | 174.0873  | 87.5473         | 202.0822  | 101.5448        | 184.0717       | 92.5395          | G    | 1370.5706 | 685.7890        | 1352.5601      | 676.7837         | 1353.5441 | 677.2757        | 13 |
| 4  | 74.0600  | 275.1350  | 138.0711        | 303.1299  | 152.0686        | 285.1193       | 143.0633         | T    | 1313.5492 | 657.2782        | 1295.5386      | 648.2729         | 1296.5226 | 648.7650        | 12 |
| 5  | 60.0444  | 362.1670  | 181.5872        | 390.1619  | 195.5846        | 372.1514       | 186.5793         | S    | 1212.5015 | 606.7544        | 1194.4909      | 597.7491         | 1195.4750 | 598.2411        | 11 |
| 6  | 72.0808  | 461.2354  | 231.1214        | 489.2304  | 245.1188        | 471.2198       | 236.1135         | V    | 1125.4695 | 563.2384        | 1107.4589      | 554.2331         | 1108.4429 | 554.7251        | 10 |
| 7  | 87.0553  | 575.2784  | 288.1428        | 603.2733  | 302.1403        | 585.2627       | 293.1350         | N    | 1026.4011 | 513.7042        | 1008.3905      | 504.6989         | 1009.3745 | 505.1909        | 9  |
| 8  | 102.0550 | 704.3210  | 352.6641        | 732.3159  | 366.6616        | 714.3053       | 357.6563         | E    | 912.3581  | 456.6827        | 894.3476       | 447.6774         | 895.3316  | 448.1694        | 8  |
| 9  | 70.0651  | 801.3737  | 401.1905        | 829.3686  | 415.1880        | 811.3581       | 406.1827         | P    | 783.3155  | 392.1614        | 765.3050       | 383.1561         | 766.2890  | 383.6481        | 7  |
| 10 | 70.0651  | 898.4265  | 449.7169        | 926.4214  | 463.7143        | 908.4108       | 454.7091         | P    | 686.2628  | 343.6350        | 668.2522       | 334.6297         | 669.2362  | 335.1218        | 6  |
| 11 | 102.0550 | 1027.4691 | 514.2382        | 1055.4640 | 528.2356        | 1037.4534      | 519.2304         | E    | 589.2100  | 295.1086        | 571.1994       | 286.1034         | 572.1835  | 286.5954        | 5  |
| 12 | 70.0651  | 1124.5218 | 562.7646        | 1152.5168 | 576.7620        | 1134.5062      | 567.7567         | P    | 460.1674  | 230.5873        | 442.1569       | 221.5821         | 443.1409  | 222.0741        | 4  |
| 13 | 88.0393  | 1239.5488 | 620.2780        | 1267.5437 | 634.2755        | 1249.5331      | 625.2702         | D    | 363.1147  | 182.0610        | 345.1041       | 173.0557         | 346.0881  | 173.5477        | 3  |
| 14 | 88.0393  | 1354.5757 | 677.7915        | 1382.5706 | 691.7890        | 1364.5601      | 682.7837         | D    | 248.0877  | 124.5475        | 230.0771       | 115.5422         | 231.0612  | 116.0342        | 2  |
| 15 | 87.0553  |           |                 |           |                 |                |                  | N    | 133.0608  | 67.0340         |                |                  | 116.0342  | 58.5207         | 1  |

| Seq    | ya       | yb       | Seq    | ya       | yb       | Seq     | ya       | yb       |
|--------|----------|----------|--------|----------|----------|---------|----------|----------|
| GG     | 87.0553  | 115.0502 | GGT    | 188.1030 | 216.0979 | GGTS    | 275.1350 | 303.1299 |
| GGTSV  | 374.2034 | 402.1983 | GGTSVN | 488.2463 | 516.2413 | GGTSVNE | 617.2889 | 645.2838 |
| GT     | 131.0815 | 159.0764 | GTS    | 218.1135 | 246.1084 | GTSV    | 317.1819 | 345.1769 |
| GTSVN  | 431.2249 | 459.2198 | GTSVNE | 560.2675 | 588.2624 | GTSVNEP | 657.3202 | 685.3151 |
| TS     | 161.0921 | 189.0870 | TSV    | 260.1605 | 288.1554 | TSVN    | 374.2034 | 402.1983 |
| TSVNE  | 503.2460 | 531.2409 | TSVNEP | 600.2988 | 628.2937 | TSVNEPP | 697.3515 | 725.3464 |
| SV     | 159.1128 | 187.1077 | SVN    | 273.1557 | 301.1506 | SVNE    | 402.1983 | 430.1932 |
| SVNEP  | 499.2511 | 527.2460 | SVNEPP | 596.3039 | 624.2988 | VN      | 186.1237 | 214.1186 |
| VNE    | 315.1663 | 343.1612 | VNEP   | 412.2191 | 440.2140 | VNEPP   | 509.2718 | 537.2667 |
| VNEPPE | 638.3144 | 666.3093 | NE     | 216.0979 | 244.0928 | NEP     | 313.1506 | 341.1456 |
| NEPP   | 410.2034 | 438.1983 | NEPPE  | 539.2460 | 567.2409 | NEPPEP  | 636.2988 | 664.2937 |
| EP     | 199.1077 | 227.1026 | EPP    | 296.1605 | 324.1554 | EPPE    | 425.2031 | 453.1980 |
| EPPEP  | 522.2558 | 550.2508 | EPPEPD | 637.2828 | 665.2777 | PP      | 167.1179 | 195.1128 |
| PPE    | 296.1605 | 324.1554 | PPEP   | 393.2132 | 421.2082 | PPEPD   | 508.2402 | 536.2351 |
| PPEPDD | 623.2671 | 651.2620 | PE     | 199.1077 | 227.1026 | PEP     | 296.1605 | 324.1554 |
| PEPD   | 411.1874 | 439.1823 | PEPDD  | 526.2144 | 554.2093 | EP      | 199.1077 | 227.1026 |
| EPD    | 314.1347 | 342.1296 | EPDD   | 429.1616 | 457.1565 | PD      | 185.0921 | 213.0870 |
| PDD    | 300.1190 | 328.1139 | DD     | 203.0662 | 231.0612 |         |          |          |

H2A.L.2 (H2A.Lap3, H2A.B.1): **VVQNNEQLHQLFK**

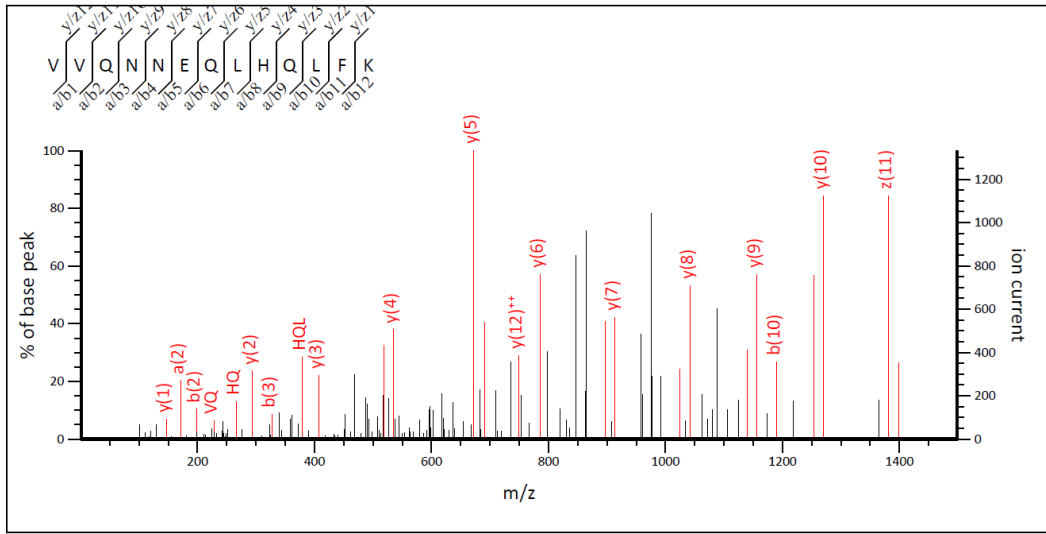

Monoisotopic mass of neutral peptide Mr(calc): 1595.8420  
 Fixed modifications: Carbamidomethyl (C) (apply to specified residues or termini only)  
 Ions Score: 85 Expect: 1.1e-08  
 Matches : 28/203 fragment ions using 39 most intense peaks ([help](#))

| #  | Immon.   | a               | a <sup>++</sup> | b                | b <sup>++</sup> | b <sup>0</sup> | b <sup>0++</sup> | Seq. | y                | y <sup>++</sup> | y <sup>0</sup>   | y <sup>0++</sup> | z                | z <sup>++</sup> | #  |
|----|----------|-----------------|-----------------|------------------|-----------------|----------------|------------------|------|------------------|-----------------|------------------|------------------|------------------|-----------------|----|
| 1  | 72.0808  | 72.0808         | 36.5440         | 100.0757         | 50.5415         |                |                  | V    |                  |                 |                  |                  |                  |                 | 13 |
| 2  | 72.0808  | <b>171.1492</b> | 86.0782         | <b>199.1441</b>  | 100.0757        |                |                  | V    | 1497.7809        | <b>749.3941</b> | 1479.7703        | 740.3888         | 1480.7543        | 740.8808        | 12 |
| 3  | 101.0709 | 299.2078        | 150.1075        | <b>327.2027</b>  | 164.1050        |                |                  | Q    | <b>1398.7124</b> | 699.8599        | 1380.7019        | <b>690.8546</b>  | <b>1381.6859</b> | 691.3466        | 11 |
| 4  | 87.0553  | 413.2507        | 207.1290        | 441.2456         | 221.1264        |                |                  | N    | <b>1270.6539</b> | 635.8306        | 1252.6433        | 626.8253         | <b>1253.6273</b> | 627.3173        | 10 |
| 5  | 87.0553  | 527.2936        | 264.1504        | 555.2885         | 278.1479        |                |                  | N    | <b>1156.6109</b> | 578.8091        | 1138.6004        | 569.8038         | <b>1139.5844</b> | 570.2958        | 9  |
| 6  | 102.0550 | 656.3362        | 328.6717        | 684.3311         | 342.6692        | 666.3206       | 333.6639         | E    | <b>1042.5680</b> | 521.7876        | <b>1024.5574</b> | 512.7824         | 1025.5415        | 513.2744        | 8  |
| 7  | 101.0709 | 784.3948        | 392.7010        | 812.3897         | 406.6985        | 794.3791       | 397.6932         | Q    | <b>913.5254</b>  | 457.2663        |                  |                  | <b>896.4989</b>  | 448.7531        | 7  |
| 8  | 86.0964  | 897.4789        | 449.2431        | 925.4738         | 463.2405        | 907.4632       | 454.2352         | L    | <b>785.4668</b>  | 393.2371        |                  |                  | 768.4403         | 384.7238        | 6  |
| 9  | 110.0713 | 1034.5378       | 517.7725        | 1062.5327        | 531.7700        | 1044.5221      | 522.7647         | H    | <b>672.3828</b>  | 336.6950        |                  |                  | 655.3562         | 328.1817        | 5  |
| 10 | 101.0709 | 1162.5963       | 581.8018        | <b>1190.5913</b> | 595.7993        | 1172.5807      | 586.7940         | Q    | <b>535.3239</b>  | 268.1656        |                  |                  | <b>518.2973</b>  | 259.6523        | 4  |
| 11 | 86.0964  | 1275.6804       | 638.3438        | 1303.6753        | 652.3413        | 1285.6648      | 643.3360         | L    | <b>407.2653</b>  | 204.1363        |                  |                  | 390.2387         | 195.6230        | 3  |
| 12 | 120.0808 | 1422.7488       | 711.8781        | 1450.7437        | 725.8755        | 1432.7332      | 716.8702         | F    | <b>294.1812</b>  | 147.5942        |                  |                  | 277.1547         | 139.0810        | 2  |
| 13 | 101.1073 |                 |                 |                  |                 |                |                  | K    | <b>147.1128</b>  | 74.0600         |                  |                  | 130.0863         | 65.5468         | 1  |

| Seq   | ya       | yb              | Seq   | ya       | yb              | Seq   | ya       | yb              |
|-------|----------|-----------------|-------|----------|-----------------|-------|----------|-----------------|
| VQ    | 200.1394 | <b>228.1343</b> | VQN   | 314.1823 | 342.1772        | VQNN  | 428.2252 | 456.2201        |
| VQNE  | 557.2678 | 585.2627        | VQNEQ | 685.3264 | 713.3213        | QN    | 215.1139 | 243.1088        |
| QNN   | 329.1568 | 357.1517        | QNE   | 458.1994 | 486.1943        | QNEQ  | 586.2580 | 614.2529        |
| QNEQL | 699.3420 | 727.3369        | NN    | 201.0982 | 229.0931        | NNE   | 330.1408 | 358.1357        |
| NNEQ  | 458.1994 | 486.1943        | NNEQL | 571.2835 | 599.2784        | NE    | 216.0979 | 244.0928        |
| NEQ   | 344.1565 | 372.1514        | NEQL  | 457.2405 | 485.2354        | NEQLH | 594.2994 | 622.2944        |
| EQ    | 230.1135 | 258.1084        | EQL   | 343.1976 | 371.1925        | EQLH  | 480.2565 | 508.2514        |
| EQLHQ | 608.3151 | 636.3100        | QL    | 214.1550 | 242.1499        | QLH   | 351.2139 | <b>379.2088</b> |
| QLHQ  | 479.2725 | 507.2674        | QLHQL | 592.3566 | 620.3515        | LH    | 223.1553 | 251.1503        |
| LHQ   | 351.2139 | <b>379.2088</b> | LHQL  | 464.2980 | 492.2929        | LHQLF | 611.3664 | 639.3613        |
| HQ    | 238.1299 | <b>266.1248</b> | HQL   | 351.2139 | <b>379.2088</b> | HQLF  | 498.2823 | 526.2772        |
| QL    | 214.1550 | 242.1499        | QLF   | 361.2234 | 389.2183        | LF    | 233.1648 | 261.1598        |

H2A.L.2 (H2A.Lap3; H2A.B.1): **QGGTSVFEPPEPDDN**

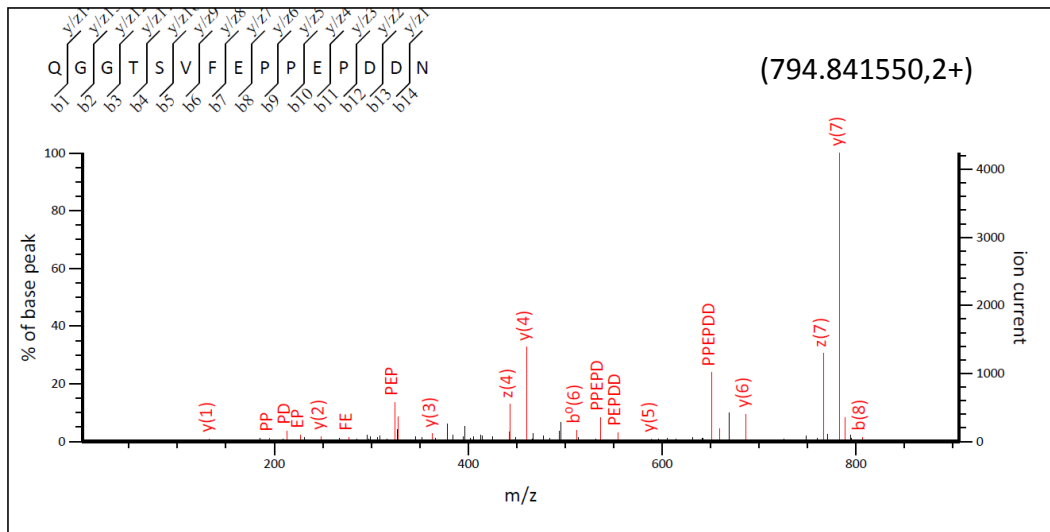

Monoisotopic mass of neutral peptide Mr(calc): 1587.6689  
 Fixed modifications: Carbamidomethyl (C) (apply to specified residues or termini only)  
 Ions Score: 39 Expect: 0.00048  
 Matches : 34/278 fragment ions using 43 most intense peaks (help)

| #  | Immon.   | a         | a <sup>++</sup> | b         | b <sup>++</sup> | b <sup>0</sup> | b <sup>0++</sup> | Seq. | y         | y <sup>++</sup> | y <sup>0</sup> | y <sup>0++</sup> | z         | z <sup>++</sup> | #  |
|----|----------|-----------|-----------------|-----------|-----------------|----------------|------------------|------|-----------|-----------------|----------------|------------------|-----------|-----------------|----|
| 1  | 101.0709 | 101.0709  | 51.0391         | 129.0659  | 65.0366         |                |                  | Q    |           |                 |                |                  |           |                 | 15 |
| 2  | 30.0338  | 158.0924  | 79.5498         | 186.0873  | 93.5473         |                |                  | G    | 1460.6176 | 730.8124        | 1442.6070      | 721.8072         | 1443.5910 | 722.2992        | 14 |
| 3  | 30.0338  | 215.1139  | 108.0606        | 243.1088  | 122.0580        |                |                  | G    | 1403.5961 | 702.3017        | 1385.5856      | 693.2964         | 1386.5696 | 693.7884        | 13 |
| 4  | 74.0600  | 316.1615  | 158.5844        | 344.1565  | 172.5819        | 326.1459       | 163.5766         | T    | 1346.5747 | 673.7910        | 1328.5641      | 664.7857         | 1329.5481 | 665.2777        | 12 |
| 5  | 60.0444  | 403.1936  | 202.1004        | 431.1885  | 216.0979        | 413.1779       | 207.0926         | S    | 1245.5270 | 623.2671        | 1227.5164      | 614.2618         | 1228.5004 | 614.7539        | 11 |
| 6  | 72.0808  | 502.2620  | 251.6346        | 530.2569  | 265.6321        | 512.2463       | 256.6268         | V    | 1158.4950 | 579.7511        | 1140.4844      | 570.7458         | 1141.4684 | 571.2378        | 10 |
| 7  | 120.0808 | 649.3304  | 325.1688        | 677.3253  | 339.1663        | 659.3148       | 330.1610         | F    | 1059.4265 | 530.2169        | 1041.4160      | 521.2116         | 1042.4000 | 521.7036        | 9  |
| 8  | 102.0550 | 778.3730  | 389.6901        | 806.3679  | 403.6876        | 788.3573       | 394.6823         | E    | 912.3581  | 456.6827        | 894.3476       | 447.6774         | 895.3316  | 448.1694        | 8  |
| 9  | 70.0651  | 875.4258  | 438.2165        | 903.4207  | 452.2140        | 885.4101       | 443.2087         | P    | 783.3155  | 392.1614        | 765.3050       | 383.1561         | 766.2890  | 383.6481        | 7  |
| 10 | 70.0651  | 972.4785  | 486.7429        | 1000.4734 | 500.7404        | 982.4629       | 491.7351         | P    | 686.2628  | 343.6350        | 668.2522       | 334.6297         | 669.2362  | 335.1218        | 6  |
| 11 | 102.0550 | 1101.5211 | 551.2642        | 1129.5160 | 565.2617        | 1111.5055      | 556.2564         | E    | 589.2100  | 295.1086        | 571.1994       | 286.1034         | 572.1835  | 286.5954        | 5  |
| 12 | 70.0651  | 1198.5739 | 599.7906        | 1226.5688 | 613.7880        | 1208.5582      | 604.7828         | P    | 460.1674  | 230.5873        | 442.1569       | 221.5821         | 443.1409  | 222.0741        | 4  |
| 13 | 88.0393  | 1313.6008 | 657.3040        | 1341.5957 | 671.3015        | 1323.5852      | 662.2962         | D    | 363.1147  | 182.0610        | 345.1041       | 173.0557         | 346.0881  | 173.5477        | 3  |
| 14 | 88.0393  | 1428.6278 | 714.8175        | 1456.6227 | 728.8150        | 1438.6121      | 719.8097         | D    | 248.0877  | 124.5475        | 230.0771       | 115.5422         | 231.0612  | 116.0342        | 2  |
| 15 | 87.0553  |           |                 |           |                 |                |                  | N    | 133.0608  | 67.0340         |                |                  | 116.0342  | 58.5207         | 1  |

| Seq   | ya       | yb       | Seq    | ya       | yb       | Seq     | ya       | yb       |
|-------|----------|----------|--------|----------|----------|---------|----------|----------|
| GG    | 87.0553  | 115.0502 | GGT    | 188.1030 | 216.0979 | GGTS    | 275.1350 | 303.1299 |
| GGTSV | 374.2034 | 402.1983 | GGTSVF | 521.2718 | 549.2667 | GGTSVFE | 650.3144 | 678.3093 |
| GT    | 131.0815 | 159.0764 | GTS    | 218.1135 | 246.1084 | GTSV    | 317.1819 | 345.1769 |
| GTSVF | 464.2504 | 492.2453 | GTSVFE | 593.2930 | 621.2879 | GTSVFEP | 690.3457 | 718.3406 |
| TS    | 161.0921 | 189.0870 | TSV    | 260.1605 | 288.1554 | TSVF    | 407.2289 | 435.2238 |
| TSVFE | 536.2715 | 564.2664 | TSVFEP | 633.3243 | 661.3192 | SV      | 159.1128 | 187.1077 |
| SVF   | 306.1812 | 334.1761 | SVFE   | 435.2238 | 463.2187 | SVFEP   | 532.2766 | 560.2715 |
| SVFEP | 629.3293 | 657.3243 | VF     | 219.1492 | 247.1441 | VFE     | 348.1918 | 376.1867 |
| VFEP  | 445.2445 | 473.2395 | VFEP   | 542.2973 | 570.2922 | VFEPPE  | 671.3399 | 699.3348 |
| FE    | 249.1234 | 277.1183 | FEP    | 346.1761 | 374.1710 | FEPPE   | 443.2289 | 471.2238 |
| FEPPE | 572.2715 | 600.2664 | FEPPEP | 669.3243 | 697.3192 | EP      | 199.1077 | 227.1026 |
| EPP   | 296.1605 | 324.1554 | EPPE   | 425.2031 | 453.1980 | EPPEP   | 522.2558 | 550.2508 |
| EPPEP | 637.2828 | 665.2777 | PP     | 167.1179 | 195.1128 | PPE     | 296.1605 | 324.1554 |
| PPEP  | 393.2132 | 421.2082 | PPEPD  | 508.2402 | 536.2351 | PPEPDD  | 623.2671 | 651.2620 |
| PE    | 199.1077 | 227.1026 | PEP    | 296.1605 | 324.1554 | PEPD    | 411.1874 | 439.1823 |
| PEPDD | 526.2144 | 554.2093 | EP     | 199.1077 | 227.1026 | EPD     | 314.1347 | 342.1296 |
| EPDD  | 429.1616 | 457.1565 | PD     | 185.0921 | 213.0870 | PDD     | 300.1190 | 328.1139 |
| DD    | 203.0662 | 231.0612 |        |          |          |         |          |          |

H2A.L.2 (H2A.Lap3; H2A.B.1): **IAP<sup>2</sup>EHVCR**

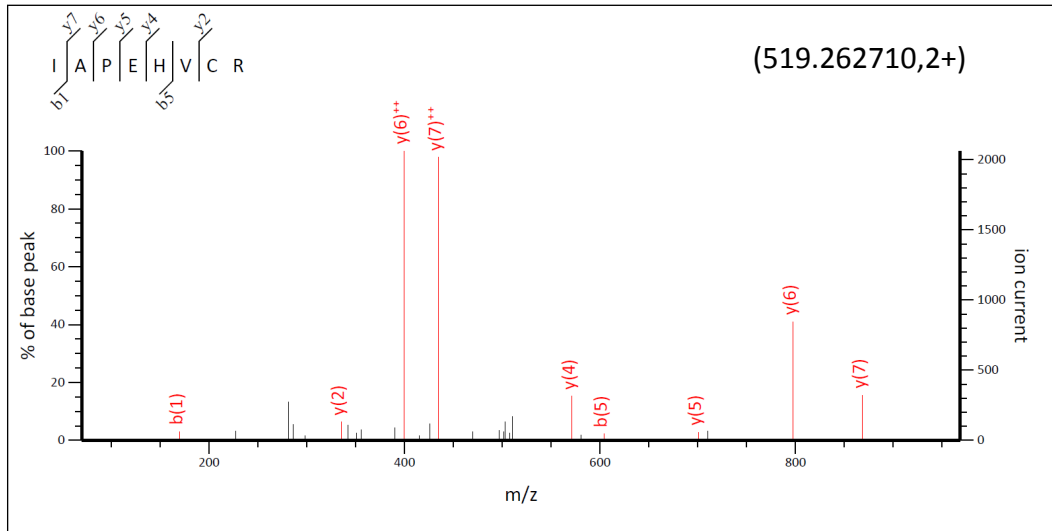

Monoisotopic mass of neutral peptide Mr(calc): 1036.5124

Fixed modifications: Carbamidomethyl (C), Propionyl (N-term) (apply to specified residues or termini only)

Ions Score: 47 Expect: 0.0024

Matches : 11/56 fragment ions using 14 most intense peaks ([help](#))

| # | b        | b <sup>++</sup> | b <sup>0</sup> | b <sup>0++</sup> | Seq. | y        | y <sup>++</sup> | y*       | y <sup>*++</sup> | y <sup>0</sup> | y <sup>0++</sup> | # |
|---|----------|-----------------|----------------|------------------|------|----------|-----------------|----------|------------------|----------------|------------------|---|
| 1 | 170.1176 | 85.5624         |                |                  | I    |          |                 |          |                  |                |                  | 8 |
| 2 | 241.1547 | 121.0810        |                |                  | A    | 868.4094 | 434.7083        | 851.3828 | 426.1951         | 850.3988       | 425.7031         | 7 |
| 3 | 338.2074 | 169.6074        |                |                  | P    | 797.3723 | 399.1898        | 780.3457 | 390.6765         | 779.3617       | 390.1845         | 6 |
| 4 | 467.2500 | 234.1287        | 449.2395       | 225.1234         | E    | 700.3195 | 350.6634        | 683.2930 | 342.1501         | 682.3090       | 341.6581         | 5 |
| 5 | 604.3089 | 302.6581        | 586.2984       | 293.6528         | H    | 571.2769 | 286.1421        | 554.2504 | 277.6288         |                |                  | 4 |
| 6 | 703.3774 | 352.1923        | 685.3668       | 343.1870         | V    | 434.2180 | 217.6126        | 417.1915 | 209.0994         |                |                  | 3 |
| 7 | 863.4080 | 432.2076        | 845.3974       | 423.2024         | C    | 335.1496 | 168.0784        | 318.1231 | 159.5652         |                |                  | 2 |
| 8 |          |                 |                |                  | R    | 175.1190 | 88.0631         | 158.0924 | 79.5498          |                |                  | 1 |



## H2B.L.2: NIHVGLSLSQR

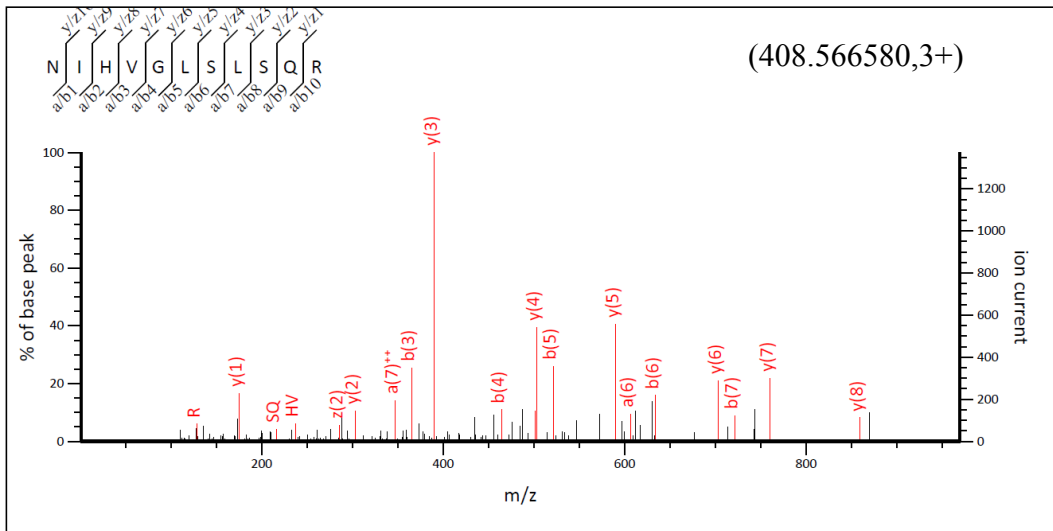

Monoisotopic mass of neutral peptide Mr(calc): 1222.6782  
 Fixed modifications: Carbamidomethyl (C) (apply to specified residues or termini only)  
 Ions Score: 60 Expect: 3e-05  
 Matches : 22/180 fragment ions using 30 most intense peaks ([help](#))

| #  | Immon.          | a               | a <sup>++</sup> | b               | b <sup>++</sup> | b <sup>0</sup>  | b <sup>0++</sup> | Seq. | y               | y <sup>++</sup> | y <sup>0</sup> | y <sup>0++</sup> | z               | z <sup>++</sup> | #  |
|----|-----------------|-----------------|-----------------|-----------------|-----------------|-----------------|------------------|------|-----------------|-----------------|----------------|------------------|-----------------|-----------------|----|
| 1  | 87.0553         | 87.0553         | 44.0313         | 115.0502        | 58.0287         |                 |                  | N    |                 |                 |                |                  |                 |                 | 11 |
| 2  | 86.0964         | 200.1394        | 100.5733        | 228.1343        | 114.5708        |                 |                  | I    | 1109.6426       | 555.3249        | 1091.6320      | 546.3196         | 1092.6160       | 546.8116        | 10 |
| 3  | 110.0713        | 337.1983        | 169.1028        | <b>365.1932</b> | 183.1002        |                 |                  | H    | 996.5585        | 498.7829        | 978.5479       | 489.7776         | 979.5320        | 490.2696        | 9  |
| 4  | 72.0808         | 436.2667        | 218.6370        | <b>464.2616</b> | 232.6344        |                 |                  | V    | <b>859.4996</b> | 430.2534        | 841.4890       | 421.2482         | 842.4730        | 421.7402        | 8  |
| 5  | 30.0338         | 493.2881        | 247.1477        | <b>521.2831</b> | 261.1452        |                 |                  | G    | <b>760.4312</b> | 380.7192        | 742.4206       | 371.7139         | 743.4046        | 372.2060        | 7  |
| 6  | 86.0964         | <b>606.3722</b> | 303.6897        | <b>634.3671</b> | 317.6872        |                 |                  | L    | <b>703.4097</b> | 352.2085        | 685.3991       | 343.2032         | 686.3832        | 343.6952        | 6  |
| 7  | 60.0444         | 693.4042        | <b>347.2058</b> | <b>721.3991</b> | 361.2032        | <b>703.3886</b> | 352.1979         | S    | <b>590.3256</b> | 295.6665        | 572.3151       | 286.6612         | 573.2991        | 287.1532        | 5  |
| 8  | 86.0964         | 806.4883        | 403.7478        | 834.4832        | 417.7452        | 816.4726        | 408.7400         | L    | <b>503.2936</b> | 252.1504        | 485.2831       | 243.1452         | 486.2671        | 243.6372        | 4  |
| 9  | 60.0444         | 893.5203        | 447.2638        | 921.5152        | 461.2613        | 903.5047        | 452.2560         | S    | <b>390.2096</b> | 195.6084        | 372.1990       | 186.6031         | 373.1830        | 187.0951        | 3  |
| 10 | 101.0709        | 1021.5789       | 511.2931        | 1049.5738       | 525.2905        | 1031.5633       | 516.2853         | Q    | <b>303.1775</b> | 152.0924        |                |                  | <b>286.1510</b> | 143.5791        | 2  |
| 11 | <b>129.1135</b> |                 |                 |                 |                 |                 |                  | R    | <b>175.1190</b> | 88.0631         |                |                  | 158.0924        | 79.5498         | 1  |

| Seq   | ya              | yb              | Seq    | ya       | yb       | Seq     | ya              | yb              |
|-------|-----------------|-----------------|--------|----------|----------|---------|-----------------|-----------------|
| IH    | 223.1553        | 251.1503        | IHV    | 322.2238 | 350.2187 | IHVG    | 379.2452        | 407.2401        |
| IHVGL | 492.3293        | 520.3242        | IHVGLS | 579.3613 | 607.3562 | IHVGLSL | 692.4454        | 720.4403        |
| HV    | 209.1397        | <b>237.1346</b> | HVG    | 266.1612 | 294.1561 | HVGL    | 379.2452        | 407.2401        |
| HVGLS | 466.2772        | 494.2722        | HVGLSL | 579.3613 | 607.3562 | HVGLSLS | 666.3933        | 694.3883        |
| VG    | <b>129.1022</b> | 157.0972        | VGL    | 242.1863 | 270.1812 | VGLS    | 329.2183        | 357.2132        |
| VGLSL | 442.3024        | 470.2973        | VGLSLS | 529.3344 | 557.3293 | VGLSLSQ | 657.3930        | 685.3879        |
| GL    | 143.1179        | 171.1128        | GLS    | 230.1499 | 258.1448 | GLSL    | 343.2340        | 371.2289        |
| GLSLS | 430.2660        | 458.2609        | GLSLSQ | 558.3246 | 586.3195 | LS      | 173.1285        | 201.1234        |
| LSL   | 286.2125        | 314.2074        | LSSL   | 373.2445 | 401.2395 | LSSLQ   | <b>501.3031</b> | 529.2980        |
| SL    | 173.1285        | 201.1234        | SLS    | 260.1605 | 288.1554 | SLSQ    | 388.2191        | 416.2140        |
| LS    | 173.1285        | 201.1234        | LSQ    | 301.1870 | 329.1819 | SQ      | 188.1030        | <b>216.0979</b> |

## H2B.L.2: IASEASFLAR

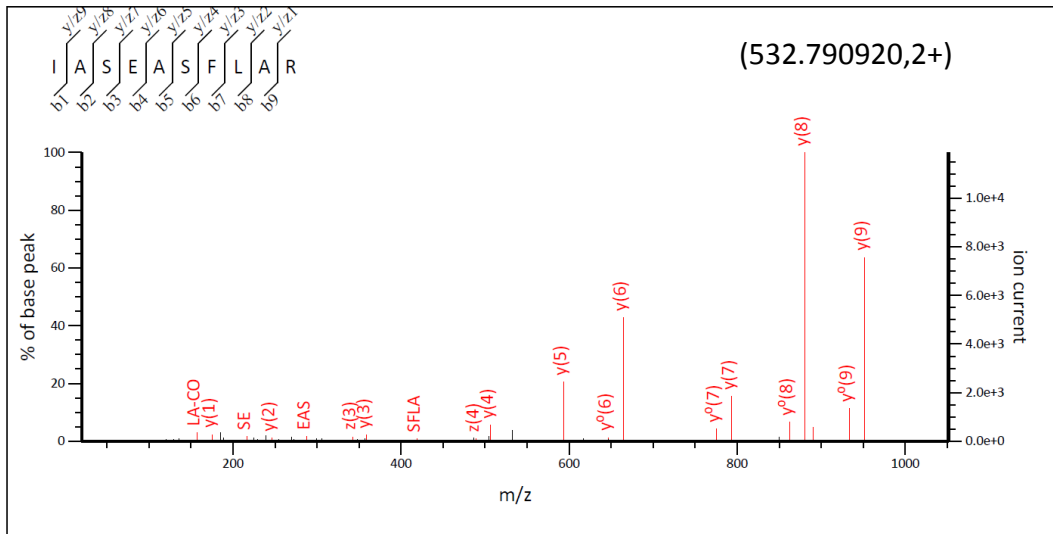

Monoisotopic mass of neutral peptide Mr(calc): 1063.5662  
 Fixed modifications: Carbamidomethyl (C) (apply to specified residues or termini only)  
 Ions Score: 83 Expect: 5.8e-07  
 Matches : 26/158 fragment ions using 30 most intense peaks ([help](#))

| #  | Immon.   | a               | a <sup>++</sup> | b               | b <sup>++</sup> | b <sup>0</sup> | b <sup>0++</sup> | Seq. | y               | y <sup>++</sup> | y <sup>0</sup>  | y <sup>0++</sup> | z               | z <sup>++</sup> | #  |
|----|----------|-----------------|-----------------|-----------------|-----------------|----------------|------------------|------|-----------------|-----------------|-----------------|------------------|-----------------|-----------------|----|
| 1  | 86.0964  | 86.0964         | 43.5519         | 114.0913        | 57.5493         |                |                  | I    |                 |                 |                 |                  |                 |                 | 10 |
| 2  | 44.0495  | <b>157.1335</b> | 79.0704         | <b>185.1285</b> | 93.0679         |                |                  | A    | <b>951.4894</b> | 476.2483        | <b>933.4789</b> | 467.2431         | 934.4629        | 467.7351        | 9  |
| 3  | 60.0444  | 244.1656        | 122.5864        | 272.1605        | 136.5839        | 254.1499       | 127.5786         | S    | <b>880.4523</b> | 440.7298        | <b>862.4417</b> | 431.7245         | 863.4258        | 432.2165        | 8  |
| 4  | 102.0550 | 373.2082        | 187.1077        | 401.2031        | 201.1052        | 383.1925       | 192.0999         | E    | <b>793.4203</b> | 397.2138        | <b>775.4097</b> | 388.2085         | 776.3937        | 388.7005        | 7  |
| 5  | 44.0495  | 444.2453        | 222.6263        | 472.2402        | 236.6237        | 454.2296       | 227.6184         | A    | <b>664.3777</b> | 332.6925        | <b>646.3671</b> | 323.6872         | 647.3511        | 324.1792        | 6  |
| 6  | 60.0444  | 531.2773        | 266.1423        | 559.2722        | 280.1397        | 541.2617       | 271.1345         | S    | <b>593.3406</b> | 297.1739        | 575.3300        | 288.1686         | 576.3140        | 288.6606        | 5  |
| 7  | 120.0808 | 678.3457        | 339.6765        | 706.3406        | 353.6740        | 688.3301       | 344.6687         | F    | <b>506.3085</b> | 253.6579        |                 |                  | <b>489.2820</b> | 245.1446        | 4  |
| 8  | 86.0964  | 791.4298        | 396.2185        | 819.4247        | 410.2160        | 801.4141       | 401.2107         | L    | <b>359.2401</b> | 180.1237        |                 |                  | <b>342.2136</b> | 171.6104        | 3  |
| 9  | 44.0495  | 862.4669        | 431.7371        | <b>890.4618</b> | 445.7345        | 872.4512       | 436.7293         | A    | <b>246.1561</b> | 123.5817        |                 |                  | 229.1295        | 115.0684        | 2  |
| 10 | 129.1135 |                 |                 |                 |                 |                |                  | R    | <b>175.1190</b> | 88.0631         |                 |                  | 158.0924        | 79.5498         | 1  |

| Seq   | ya       | yb              | Seq    | ya       | yb              | Seq     | ya              | yb              |
|-------|----------|-----------------|--------|----------|-----------------|---------|-----------------|-----------------|
| AS    | 131.0815 | 159.0764        | ASE    | 260.1241 | <b>288.1190</b> | ASEA    | 331.1612        | 359.1561        |
| ASEAS | 418.1932 | 446.1882        | ASEASF | 565.2617 | 593.2566        | ASEASFL | 678.3457        | 706.3406        |
| SE    | 189.0870 | <b>217.0819</b> | SEA    | 260.1241 | <b>288.1190</b> | SEAS    | 347.1561        | 375.1510        |
| SEASF | 494.2245 | 522.2195        | SEASFL | 607.3086 | 635.3035        | SEASFLA | 678.3457        | 706.3406        |
| EA    | 173.0921 | 201.0870        | EAS    | 260.1241 | <b>288.1190</b> | EASF    | 407.1925        | 435.1874        |
| EASFL | 520.2766 | 548.2715        | EASFLA | 591.3137 | 619.3086        | AS      | 131.0815        | 159.0764        |
| ASF   | 278.1499 | 306.1448        | ASFL   | 391.2340 | <b>419.2289</b> | ASFLA   | 462.2711        | 490.2660        |
| SF    | 207.1128 | 235.1077        | SFL    | 320.1969 | 348.1918        | SFLA    | 391.2340        | <b>419.2289</b> |
| FL    | 233.1648 | 261.1598        | FLA    | 304.2020 | 332.1969        | LA      | <b>157.1335</b> | <b>185.1285</b> |

## H2B.L.2: NSF<sup>+</sup>AIYFPK

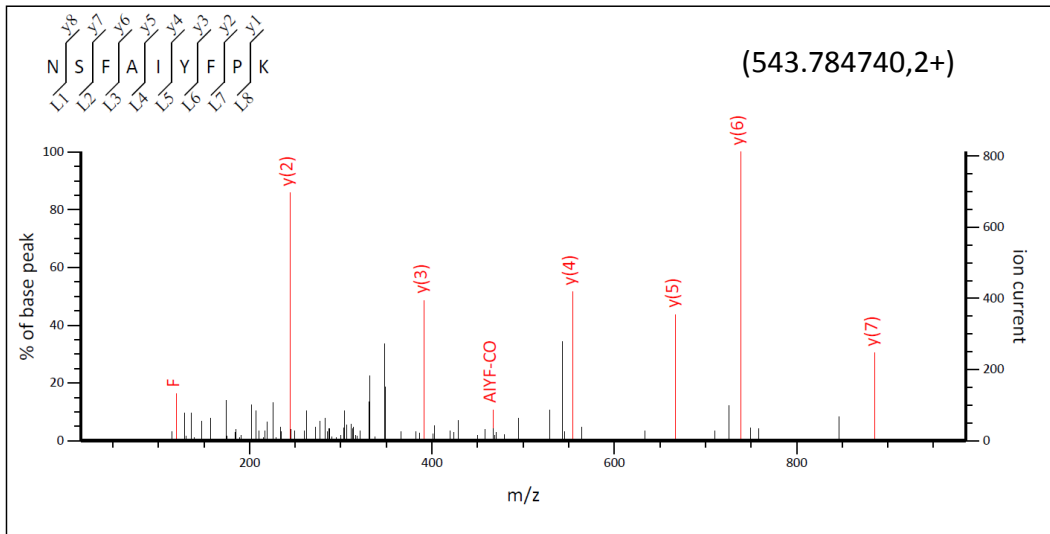

Monoisotopic mass of neutral peptide  $M_r(\text{calc})$ : 1085.5546  
 Fixed modifications: Carbamidomethyl (C) (apply to specified residues or termini only)  
 Ions Score: 64 Expect: 4.1e-06  
 Matches : 12/125 fragment ions using 8 most intense peaks ([help](#))

| # | Immon.   | a        | a <sup>++</sup> | b        | b <sup>++</sup> | b <sup>0</sup> | b <sup>0++</sup> | Seq. | y        | y <sup>++</sup> | y <sup>0</sup> | y <sup>0++</sup> | z        | z <sup>++</sup> | # |
|---|----------|----------|-----------------|----------|-----------------|----------------|------------------|------|----------|-----------------|----------------|------------------|----------|-----------------|---|
| 1 | 87.0553  | 87.0553  | 44.0313         | 115.0502 | 58.0287         |                |                  | N    |          |                 |                |                  |          |                 | 9 |
| 2 | 60.0444  | 174.0873 | 87.5473         | 202.0822 | 101.5448        | 184.0717       | 92.5395          | S    | 972.5189 | 486.7631        | 954.5084       | 477.7578         | 955.4924 | 478.2498        | 8 |
| 3 | 120.0808 | 321.1557 | 161.0815        | 349.1506 | 175.0790        | 331.1401       | 166.0737         | F    | 885.4869 | 443.2471        |                |                  | 868.4604 | 434.7338        | 7 |
| 4 | 44.0495  | 392.1928 | 196.6001        | 420.1878 | 210.5975        | 402.1772       | 201.5922         | A    | 738.4185 | 369.7129        |                |                  | 721.3919 | 361.1996        | 6 |
| 5 | 86.0964  | 505.2769 | 253.1421        | 533.2718 | 267.1395        | 515.2613       | 258.1343         | I    | 667.3814 | 334.1943        |                |                  | 650.3548 | 325.6811        | 5 |
| 6 | 136.0757 | 668.3402 | 334.6738        | 696.3352 | 348.6712        | 678.3246       | 339.6659         | Y    | 554.2973 | 277.6523        |                |                  | 537.2708 | 269.1390        | 4 |
| 7 | 120.0808 | 815.4087 | 408.2080        | 843.4036 | 422.2054        | 825.3930       | 413.2001         | F    | 391.2340 | 196.1206        |                |                  | 374.2074 | 187.6074        | 3 |
| 8 | 70.0651  | 912.4614 | 456.7343        | 940.4563 | 470.7318        | 922.4458       | 461.7265         | P    | 244.1656 | 122.5864        |                |                  | 227.1390 | 114.0731        | 2 |
| 9 | 101.1073 |          |                 |          |                 |                |                  | K    | 147.1128 | 74.0600         |                |                  | 130.0863 | 65.5468         | 1 |

| Seq   | ya       | yb       | Seq   | ya       | yb       | Seq   | ya       | yb       |
|-------|----------|----------|-------|----------|----------|-------|----------|----------|
| SF    | 207.1128 | 235.1077 | SFA   | 278.1499 | 306.1448 | SFAI  | 391.2340 | 419.2289 |
| SFAIY | 554.2973 | 582.2922 | FA    | 191.1179 | 219.1128 | FAI   | 304.2020 | 332.1969 |
| FAIY  | 467.2653 | 495.2602 | FAIYF | 614.3337 | 642.3286 | AI    | 157.1335 | 185.1285 |
| AIY   | 320.1969 | 348.1918 | AIYF  | 467.2653 | 495.2602 | AIYFP | 564.3180 | 592.3130 |
| IY    | 249.1598 | 277.1547 | IYF   | 396.2282 | 424.2231 | IYFP  | 493.2809 | 521.2758 |
| YF    | 283.1441 | 311.1390 | YFP   | 380.1969 | 408.1918 | FP    | 217.1335 | 245.1285 |

## H2B.L.2: SVNILDSFVK

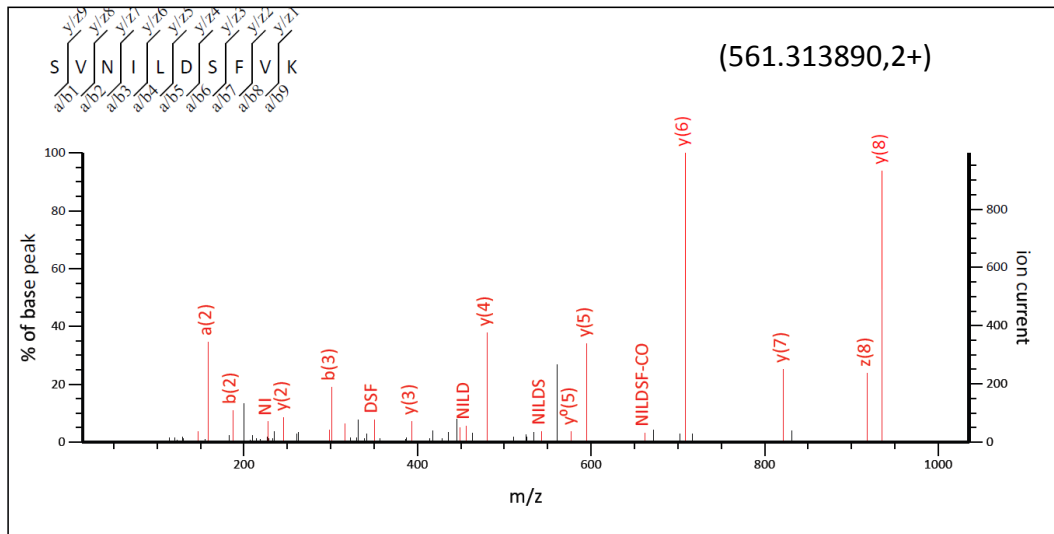

Monoisotopic mass of neutral peptide Mr(calc): 1120.6128  
 Fixed modifications: Carbamidomethyl (C) (apply to specified residues or termini only)  
 Ions Score: 67 Expect: 1.5e-06  
 Matches : 21/162 fragment ions using 29 most intense peaks ([help](#))

| #  | Immon.   | a               | a <sup>++</sup> | b               | b <sup>++</sup> | b <sup>0</sup> | b <sup>0++</sup> | Seq. | y               | y <sup>++</sup> | y <sup>0</sup>  | y <sup>0++</sup> | z               | z <sup>++</sup> | #  |
|----|----------|-----------------|-----------------|-----------------|-----------------|----------------|------------------|------|-----------------|-----------------|-----------------|------------------|-----------------|-----------------|----|
| 1  | 60.0444  | 60.0444         | 30.5258         | 88.0393         | 44.5233         | 70.0287        | 35.5180          | S    |                 |                 |                 |                  |                 |                 | 10 |
| 2  | 72.0808  | <b>159.1128</b> | 80.0600         | <b>187.1077</b> | 94.0575         | 169.0972       | 85.0522          | V    | 1034.5881       | 517.7977        | 1016.5775       | 508.7924         | 1017.5615       | 509.2844        | 9  |
| 3  | 87.0553  | 273.1557        | 137.0815        | <b>301.1506</b> | 151.0790        | 283.1401       | 142.0737         | N    | <b>935.5197</b> | 468.2635        | 917.5091        | 459.2582         | <b>918.4931</b> | 459.7502        | 8  |
| 4  | 86.0964  | 386.2398        | 193.6235        | 414.2347        | 207.6210        | 396.2241       | 198.6157         | I    | <b>821.4767</b> | 411.2420        | 803.4662        | 402.2367         | 804.4502        | 402.7287        | 7  |
| 5  | 86.0964  | 499.3239        | 250.1656        | 527.3188        | 264.1630        | 509.3082       | 255.1577         | L    | <b>708.3927</b> | 354.7000        | 690.3821        | 345.6947         | 691.3661        | 346.1867        | 6  |
| 6  | 88.0393  | 614.3508        | 307.6790        | 642.3457        | 321.6765        | 624.3352       | 312.6712         | D    | <b>595.3086</b> | <b>298.1579</b> | <b>577.2980</b> | 289.1527         | 578.2821        | 289.6447        | 5  |
| 7  | 60.0444  | 701.3828        | 351.1951        | 729.3777        | 365.1925        | 711.3672       | 356.1872         | S    | <b>480.2817</b> | 240.6445        | 462.2711        | 231.6392         | 463.2551        | 232.1312        | 4  |
| 8  | 120.0808 | 848.4512        | 424.7293        | 876.4462        | 438.7267        | 858.4356       | 429.7214         | F    | <b>393.2496</b> | 197.1285        |                 |                  | 376.2231        | 188.6152        | 3  |
| 9  | 72.0808  | 947.5197        | 474.2635        | 975.5146        | 488.2609        | 957.5040       | 479.2556         | V    | <b>246.1812</b> | 123.5942        |                 |                  | 229.1547        | 115.0810        | 2  |
| 10 | 101.1073 |                 |                 |                 |                 |                |                  | K    | <b>147.1128</b> | 74.0600         |                 |                  | 130.0863        | 65.5468         | 1  |

| Seq    | ya              | yb              | Seq    | ya       | yb              | Seq    | ya       | yb              |
|--------|-----------------|-----------------|--------|----------|-----------------|--------|----------|-----------------|
| VN     | 186.1237        | 214.1186        | VNI    | 299.2078 | 327.2027        | VNIL   | 412.2918 | 440.2867        |
| VNILD  | 527.3188        | 555.3137        | VNILDS | 614.3508 | 642.3457        | NI     | 200.1394 | <b>228.1343</b> |
| NIL    | 313.2234        | 341.2183        | NILD   | 428.2504 | <b>456.2453</b> | NILDS  | 515.2824 | <b>543.2773</b> |
| NILDSF | <b>662.3508</b> | 690.3457        | IL     | 199.1805 | 227.1754        | ILD    | 314.2074 | 342.2023        |
| ILDS   | 401.2395        | 429.2344        | ILDSF  | 548.3079 | 576.3028        | ILDSFV | 647.3763 | 675.3712        |
| LD     | 201.1234        | 229.1183        | LDS    | 288.1554 | <b>316.1503</b> | LDSF   | 435.2238 | 463.2187        |
| LDSFV  | 534.2922        | 562.2871        | DS     | 175.0713 | 203.0662        | DSF    | 322.1397 | <b>350.1347</b> |
| DSFV   | 421.2082        | <b>449.2031</b> | SF     | 207.1128 | 235.1077        | SFV    | 306.1812 | 334.1761        |
| FV     | 219.1492        | 247.1441        |        |          |                 |        |          |                 |

### H3.3 (Gene: *Gm10257*): **K(ac)SVPSTGGVK(pr)K(pr)PHR**

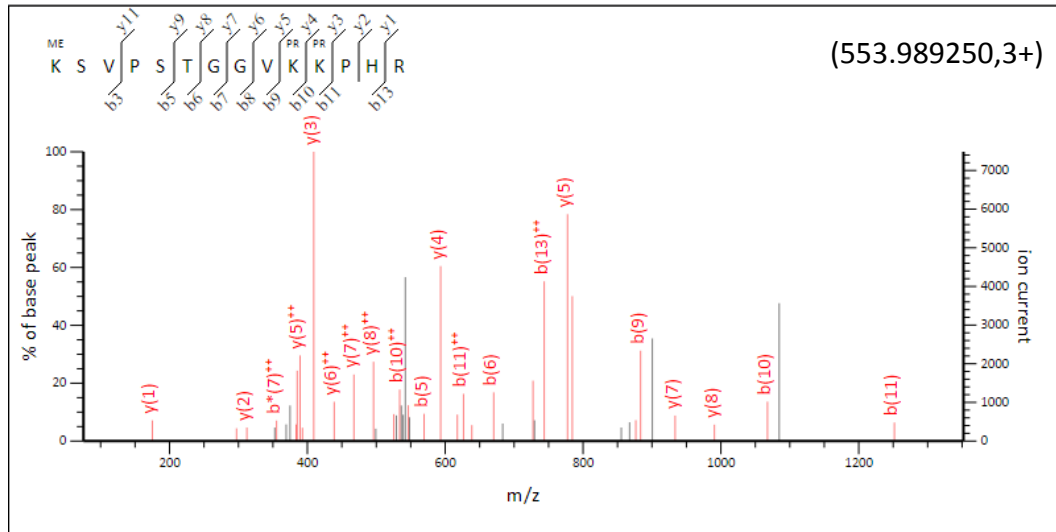

Monoisotopic mass of neutral peptide Mr(calc): 1658.9468

Fixed modifications: Carbamidomethyl (C), Propionyl (N-term) (apply to specified residues or termini only)

Variable modifications:

K1 : Methyl (K)

K10 : Propionyl (K)

K11 : Propionyl (K)

Ions Score: 64 Expect: 0.00017

Matches : 35/138 fragment ions using 42 most intense peaks ([help](#))

| #  | b                | b <sup>++</sup> | b <sup>*</sup> | b <sup>+++</sup> | b <sup>0</sup> | b <sup>0++</sup> | Seq. | y               | y <sup>++</sup> | y <sup>*</sup> | y <sup>+++</sup> | y <sup>0</sup> | y <sup>0++</sup> | #  |
|----|------------------|-----------------|----------------|------------------|----------------|------------------|------|-----------------|-----------------|----------------|------------------|----------------|------------------|----|
| 1  | 199.1441         | 100.0757        | 182.1176       | 91.5624          |                |                  | K    |                 |                 |                |                  |                |                  | 14 |
| 2  | 286.1761         | 143.5917        | 269.1496       | 135.0784         | 268.1656       | 134.5864         | S    | 1461.8172       | 731.4123        | 1444.7907      | 722.8990         | 1443.8067      | 722.4070         | 13 |
| 3  | <b>385.2445</b>  | 193.1259        | 368.2180       | 184.6126         | 367.2340       | 184.1206         | V    | 1374.7852       | 687.8962        | 1357.7587      | 679.3830         | 1356.7746      | 678.8910         | 12 |
| 4  | 482.2973         | 241.6523        | 465.2708       | 233.1390         | 464.2867       | 232.6470         | P    | 1275.7168       | <b>638.3620</b> | 1258.6902      | 629.8488         | 1257.7062      | 629.3568         | 11 |
| 5  | <b>569.3293</b>  | 285.1683        | 552.3028       | 276.6550         | 551.3188       | 276.1630         | S    | 1178.6640       | 589.8357        | 1161.6375      | 581.3224         | 1160.6535      | 580.8304         | 10 |
| 6  | <b>670.3770</b>  | 335.6921        | 653.3505       | 327.1789         | 652.3665       | 326.6869         | T    | 1091.6320       | <b>546.3196</b> | 1074.6055      | 537.8064         | 1073.6214      | 537.3144         | 9  |
| 7  | <b>727.3985</b>  | 364.2029        | 710.3719       | <b>355.6896</b>  | 709.3879       | <b>355.1976</b>  | G    | <b>990.5843</b> | <b>495.7958</b> | 973.5578       | 487.2825         |                |                  | 8  |
| 8  | <b>784.4199</b>  | <b>392.7136</b> | 767.3934       | <b>384.2003</b>  | 766.4094       | <b>383.7083</b>  | G    | <b>933.5629</b> | <b>467.2851</b> | 916.5363       | 458.7718         |                |                  | 7  |
| 9  | <b>883.4884</b>  | 442.2478        | 866.4618       | 433.7345         | 865.4778       | 433.2425         | V    | <b>876.5414</b> | <b>438.7743</b> | 859.5148       | 430.2611         |                |                  | 6  |
| 10 | <b>1067.6095</b> | <b>534.3084</b> | 1050.5830      | <b>525.7951</b>  | 1049.5990      | <b>525.3031</b>  | K    | <b>777.4730</b> | <b>389.2401</b> | 760.4464       | 380.7269         |                |                  | 5  |
| 11 | <b>1251.7307</b> | <b>626.3690</b> | 1234.7042      | <b>617.8557</b>  | 1233.7202      | <b>617.3637</b>  | K    | <b>593.3518</b> | <b>297.1795</b> | 576.3253       | 288.6663         |                |                  | 4  |
| 12 | 1348.7835        | 674.8954        | 1331.7569      | 666.3821         | 1330.7729      | 665.8901         | P    | <b>409.2306</b> | 205.1190        | 392.2041       | 196.6057         |                |                  | 3  |
| 13 | 1485.8424        | <b>743.4248</b> | 1468.8158      | 734.9116         | 1467.8318      | 734.4196         | H    | <b>312.1779</b> | 156.5926        | 295.1513       | 148.0793         |                |                  | 2  |
| 14 |                  |                 |                |                  |                |                  | R    | <b>175.1190</b> | 88.0631         | 158.0924       | 79.5498          |                |                  | 1  |

### H3.3 (Gene: *Gm6421*): RYQK(ac)ATELLIR

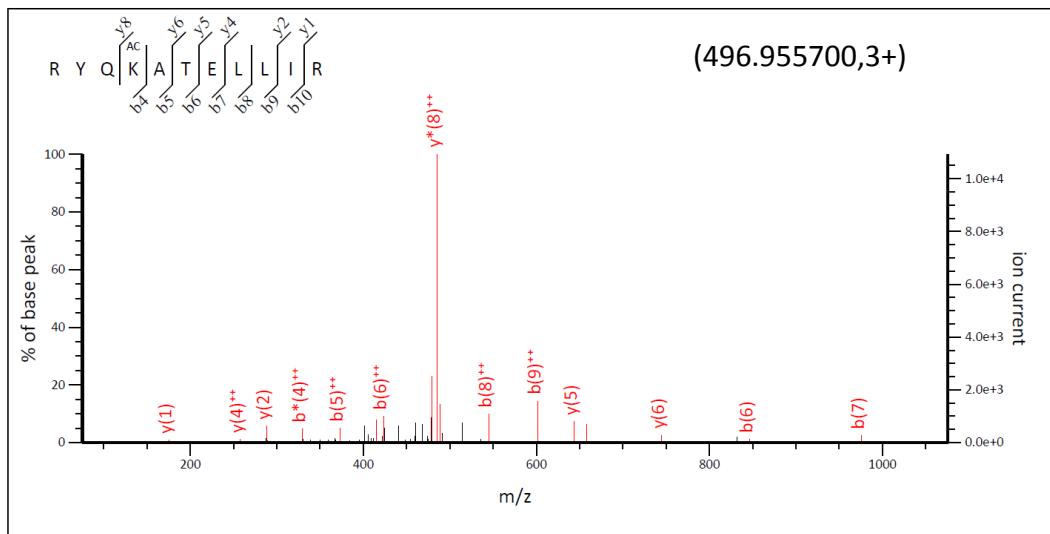

Monoisotopic mass of neutral peptide Mr(calc): 1487.8460

Fixed modifications: Carbamidomethyl (C), Propionyl (N-term) (apply to specified residues or termini only)

Variable modifications:

K4 : Acetyl (K)

Ions Score: 46 Expect: 0.013

Matches : 20/102 fragment ions using 21 most intense peaks ([help](#))

| #  | b         | b <sup>++</sup> | b <sup>*</sup> | b <sup>*++</sup> | b <sup>0</sup> | b <sup>0++</sup> | Seq. | y         | y <sup>++</sup> | y <sup>*</sup> | y <sup>*++</sup> | y <sup>0</sup> | y <sup>0++</sup> | #  |
|----|-----------|-----------------|----------------|------------------|----------------|------------------|------|-----------|-----------------|----------------|------------------|----------------|------------------|----|
| 1  | 213.1346  | 107.0709        | 196.1081       | 98.5577          |                |                  | R    |           |                 |                |                  |                |                  | 11 |
| 2  | 376.1979  | 188.6026        | 359.1714       | 180.0893         |                |                  | Y    | 1276.7260 | 638.8666        | 1259.6994      | 630.3533         | 1258.7154      | 629.8613         | 10 |
| 3  | 504.2565  | 252.6319        | 487.2300       | 244.1186         |                |                  | Q    | 1113.6626 | 557.3350        | 1096.6361      | 548.8217         | 1095.6521      | 548.3297         | 9  |
| 4  | 674.3620  | 337.6847        | 657.3355       | 329.1714         |                |                  | K    | 985.6041  | 493.3057        | 968.5775       | 484.7924         | 967.5935       | 484.3004         | 8  |
| 5  | 745.3992  | 373.2032        | 728.3726       | 364.6899         |                |                  | A    | 815.4985  | 408.2529        | 798.4720       | 399.7396         | 797.4880       | 399.2476         | 7  |
| 6  | 846.4468  | 423.7271        | 829.4203       | 415.2138         | 828.4363       | 414.7218         | T    | 744.4614  | 372.7343        | 727.4349       | 364.2211         | 726.4509       | 363.7291         | 6  |
| 7  | 975.4894  | 488.2483        | 958.4629       | 479.7351         | 957.4789       | 479.2431         | E    | 643.4137  | 322.2105        | 626.3872       | 313.6972         | 625.4032       | 313.2052         | 5  |
| 8  | 1088.5735 | 544.7904        | 1071.5469      | 536.2771         | 1070.5629      | 535.7851         | L    | 514.3711  | 257.6892        | 497.3446       | 249.1759         |                |                  | 4  |
| 9  | 1201.6576 | 601.3324        | 1184.6310      | 592.8191         | 1183.6470      | 592.3271         | L    | 401.2871  | 201.1472        | 384.2605       | 192.6339         |                |                  | 3  |
| 10 | 1314.7416 | 657.8744        | 1297.7151      | 649.3612         | 1296.7310      | 648.8692         | I    | 288.2030  | 144.6051        | 271.1765       | 136.0919         |                |                  | 2  |
| 11 |           |                 |                |                  |                |                  | R    | 175.1190  | 88.0631         | 158.0924       | 79.5498          |                |                  | 1  |

# H1.0 ( H10): **YSDMIVAAIQAEK**

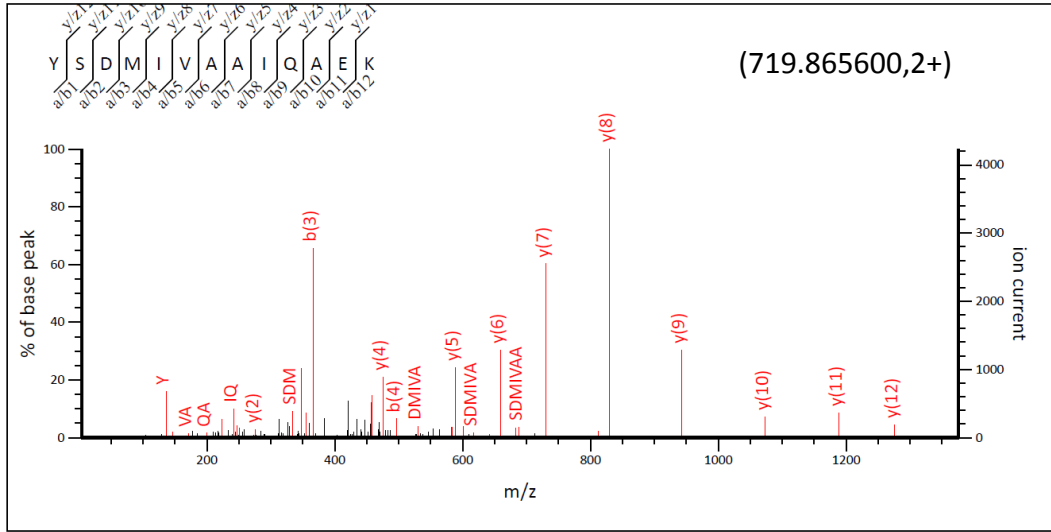

Monoisotopic mass of neutral peptide  $M_r(\text{calc})$ : 1437.7173  
 Fixed modifications: Carbamidomethyl (C) (apply to specified residues or termini only)  
 Ions Score: 135 Expect: 8.2e-13  
 Matches : 38/241 fragment ions using 38 most intense peaks ([help](#))

| #  | Immon.   | a         | a <sup>++</sup> | b         | b <sup>++</sup> | b <sup>0</sup> | b <sup>0++</sup> | Seq. | y         | y <sup>++</sup> | y <sup>0</sup> | y <sup>0++</sup> | z         | z <sup>++</sup> | #  |
|----|----------|-----------|-----------------|-----------|-----------------|----------------|------------------|------|-----------|-----------------|----------------|------------------|-----------|-----------------|----|
| 1  | 136.0757 | 136.0757  | 68.5415         | 164.0706  | 82.5389         |                |                  | Y    |           |                 |                |                  |           |                 | 13 |
| 2  | 60.0444  | 223.1077  | 112.0575        | 251.1026  | 126.0550        | 233.0921       | 117.0497         | S    | 1275.6613 | 638.3343        | 1257.6508      | 629.3290         | 1258.6348 | 629.8210        | 12 |
| 3  | 88.0393  | 338.1347  | 169.5710        | 366.1296  | 183.5684        | 348.1190       | 174.5631         | D    | 1188.6293 | 594.8183        | 1170.6187      | 585.8130         | 1171.6027 | 586.3050        | 11 |
| 4  | 104.0528 | 469.1751  | 235.0912        | 497.1701  | 249.0887        | 479.1595       | 240.0834         | M    | 1073.6023 | 537.3048        | 1055.5918      | 528.2995         | 1056.5758 | 528.7915        | 10 |
| 5  | 86.0964  | 582.2592  | 291.6332        | 610.2541  | 305.6307        | 592.2436       | 296.6254         | I    | 942.5619  | 471.7846        | 924.5513       | 462.7793         | 925.5353  | 463.2713        | 9  |
| 6  | 72.0808  | 681.3276  | 341.1675        | 709.3225  | 355.1649        | 691.3120       | 346.1596         | V    | 829.4778  | 415.2425        | 811.4672       | 406.2373         | 812.4512  | 406.7293        | 8  |
| 7  | 44.0495  | 752.3647  | 376.6860        | 780.3597  | 390.6835        | 762.3491       | 381.6782         | A    | 730.4094  | 365.7083        | 712.3988       | 356.7030         | 713.3828  | 357.1951        | 7  |
| 8  | 44.0495  | 823.4019  | 412.2046        | 851.3968  | 426.2020        | 833.3862       | 417.1967         | A    | 659.3723  | 330.1898        | 641.3617       | 321.1845         | 642.3457  | 321.6765        | 6  |
| 9  | 86.0964  | 936.4859  | 468.7466        | 964.4808  | 482.7441        | 946.4703       | 473.7388         | I    | 588.3352  | 294.6712        | 570.3246       | 285.6659         | 571.3086  | 286.1579        | 5  |
| 10 | 101.0709 | 1064.5445 | 532.7759        | 1092.5394 | 546.7733        | 1074.5288      | 537.7681         | Q    | 475.2511  | 238.1292        | 457.2405       | 229.1239         | 458.2245  | 229.6159        | 4  |
| 11 | 44.0495  | 1135.5816 | 568.2944        | 1163.5765 | 582.2919        | 1145.5660      | 573.2866         | A    | 347.1925  | 174.0999        | 329.1819       | 165.0946         | 330.1660  | 165.5866        | 3  |
| 12 | 102.0550 | 1264.6242 | 632.8157        | 1292.6191 | 646.8132        | 1274.6086      | 637.8079         | E    | 276.1554  | 138.5813        | 258.1448       | 129.5761         | 259.1288  | 130.0681        | 2  |
| 13 | 101.1073 |           |                 |           |                 |                |                  | K    | 147.1128  | 74.0600         |                |                  | 130.0863  | 65.5468         | 1  |

| Seq   | ya       | yb       | Seq    | ya       | yb       | Seq     | ya       | yb       |
|-------|----------|----------|--------|----------|----------|---------|----------|----------|
| SD    | 175.0713 | 203.0662 | SDM    | 306.1118 | 334.1067 | SDMI    | 419.1959 | 447.1908 |
| SDMIV | 518.2643 | 546.2592 | SDMIVA | 589.3014 | 617.2963 | SDMIVAA | 660.3385 | 688.3334 |
| DM    | 219.0798 | 247.0747 | DMI    | 332.1639 | 360.1588 | DMIV    | 431.2323 | 459.2272 |
| DMIVA | 502.2694 | 530.2643 | DMIVAA | 573.3065 | 601.3014 | DMIVAAI | 686.3906 | 714.3855 |
| MI    | 217.1369 | 245.1318 | MIV    | 316.2053 | 344.2002 | MIVA    | 387.2424 | 415.2374 |
| MIVAA | 458.2796 | 486.2745 | MIVAAI | 571.3636 | 599.3585 | MIVAAIQ | 699.4222 | 727.4171 |
| IV    | 185.1648 | 213.1598 | IVA    | 256.2020 | 284.1969 | IVAA    | 327.2391 | 355.2340 |
| IVAAI | 440.3231 | 468.3180 | IVAAIQ | 568.3817 | 596.3766 | IVAAIQA | 639.4188 | 667.4137 |
| VA    | 143.1179 | 171.1128 | VAA    | 214.1550 | 242.1499 | VAAI    | 327.2391 | 355.2340 |
| VAAIQ | 455.2976 | 483.2926 | VAAIQA | 526.3348 | 554.3297 | VAAIQAE | 655.3774 | 683.3723 |
| AA    | 115.0866 | 143.0815 | AAI    | 228.1707 | 256.1656 | AAIQ    | 356.2292 | 384.2241 |
| AAIQA | 427.2663 | 455.2613 | AAIQAE | 556.3089 | 584.3039 | AI      | 157.1335 | 185.1285 |
| AIQ   | 285.1921 | 313.1870 | AIQA   | 356.2292 | 384.2241 | AIQAE   | 485.2718 | 513.2667 |
| IQ    | 214.1550 | 242.1499 | IQA    | 285.1921 | 313.1870 | IQAE    | 414.2347 | 442.2296 |
| QA    | 172.1081 | 200.1030 | QAE    | 301.1506 | 329.1456 | AE      | 173.0921 | 201.0870 |

H1.0 ( H1°): **LVTTGVLK**

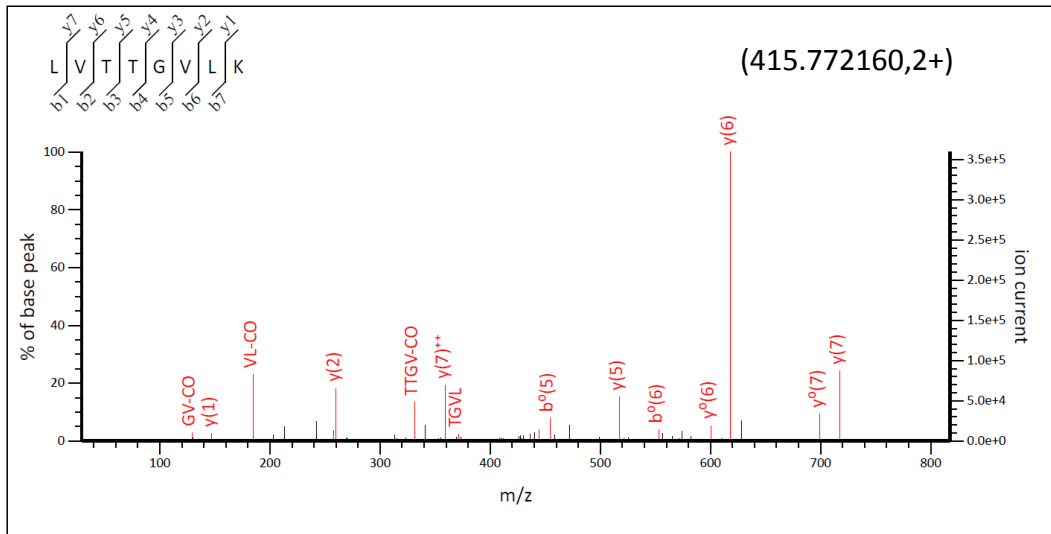

Label all possible matches  Label matches used for scoring

Monoisotopic mass of neutral peptide Mr(calc): 829.5273  
 Fixed modifications: Carbamidomethyl (C) (apply to specified residues or termini only)  
 Ions Score: 46 Expect: 0.0035  
 Matches : 26/110 fragment ions using 22 most intense peaks ([help](#))

| # | Immon.   | a        | a <sup>++</sup> | b        | b <sup>++</sup> | b <sup>0</sup> | b <sup>0++</sup> | Seq. | y        | y <sup>++</sup> | y <sup>0</sup> | y <sup>0++</sup> | z        | z <sup>++</sup> | # |
|---|----------|----------|-----------------|----------|-----------------|----------------|------------------|------|----------|-----------------|----------------|------------------|----------|-----------------|---|
| 1 | 86.0964  | 86.0964  | 43.5519         | 114.0913 | 57.5493         |                |                  | L    |          |                 |                |                  |          |                 | 8 |
| 2 | 72.0808  | 185.1648 | 93.0861         | 213.1598 | 107.0835        |                |                  | V    | 717.4505 | 359.2289        | 699.4400       | 350.2236         | 700.4240 | 350.7156        | 7 |
| 3 | 74.0600  | 286.2125 | 143.6099        | 314.2074 | 157.6074        | 296.1969       | 148.6021         | T    | 618.3821 | 309.6947        | 600.3715       | 300.6894         | 601.3556 | 301.1814        | 6 |
| 4 | 74.0600  | 387.2602 | 194.1337        | 415.2551 | 208.1312        | 397.2445       | 199.1259         | T    | 517.3344 | 259.1709        | 499.3239       | 250.1656         | 500.3079 | 250.6576        | 5 |
| 5 | 30.0338  | 444.2817 | 222.6445        | 472.2766 | 236.6419        | 454.2660       | 227.6366         | G    | 416.2867 | 208.6470        |                |                  | 399.2602 | 200.1337        | 4 |
| 6 | 72.0808  | 543.3501 | 272.1787        | 571.3450 | 286.1761        | 553.3344       | 277.1709         | V    | 359.2653 | 180.1363        |                |                  | 342.2387 | 171.6230        | 3 |
| 7 | 86.0964  | 656.4341 | 328.7207        | 684.4291 | 342.7182        | 666.4185       | 333.7129         | L    | 260.1969 | 130.6021        |                |                  | 243.1703 | 122.0888        | 2 |
| 8 | 101.1073 |          |                 |          |                 |                |                  | K    | 147.1128 | 74.0600         |                |                  | 130.0863 | 65.5468         | 1 |

| Seq   | ya       | yb       | Seq    | ya       | yb       | Seq   | ya       | yb       |
|-------|----------|----------|--------|----------|----------|-------|----------|----------|
| VT    | 173.1285 | 201.1234 | VTT    | 274.1761 | 302.1710 | VTTG  | 331.1976 | 359.1925 |
| VTTGV | 430.2660 | 458.2609 | VTTGVL | 543.3501 | 571.3450 | TT    | 175.1077 | 203.1026 |
| TIG   | 232.1292 | 260.1241 | TIGV   | 331.1976 | 359.1925 | TIGVL | 444.2817 | 472.2766 |
| TG    | 131.0815 | 159.0764 | TGV    | 230.1499 | 258.1448 | TGVL  | 343.2340 | 371.2289 |
| GV    | 129.1022 | 157.0972 | GVL    | 242.1863 | 270.1812 | VL    | 185.1648 | 213.1598 |



H1.0 ( H1°): **RLVTTGVLK**

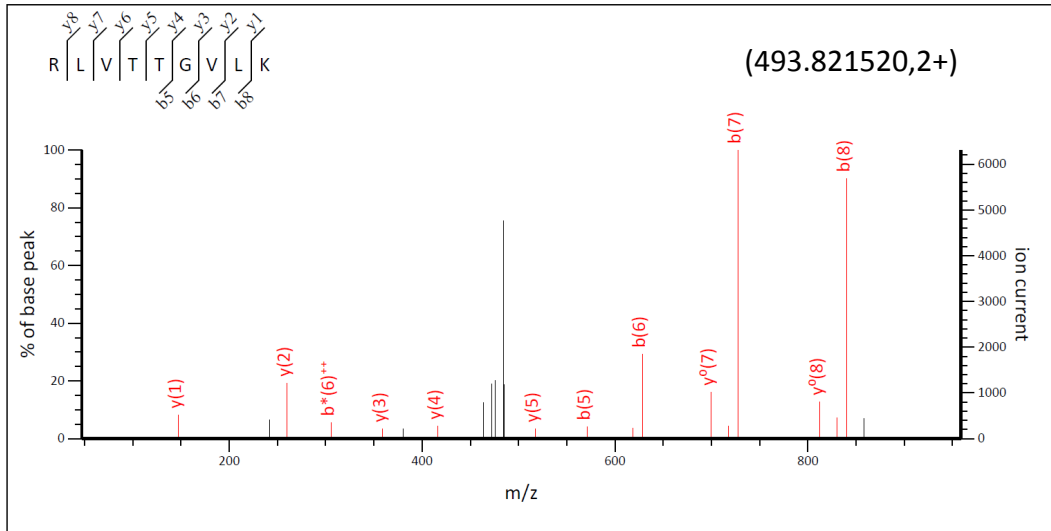

Monoisotopic mass of neutral peptide Mr(calc): 985.6284  
 Fixed modifications: Carbamidomethyl (C) (apply to specified residues or termini only)  
 Ions Score: 79 Expect: 3.6e-06  
 Matches : 18/82 fragment ions using 23 most intense peaks ([help](#))

| # | b        | b <sup>++</sup> | b <sup>*</sup> | b <sup>***</sup> | b <sup>0</sup> | b <sup>0++</sup> | Seq. | y        | y <sup>++</sup> | y <sup>*</sup> | y <sup>***</sup> | y <sup>0</sup> | y <sup>0++</sup> | # |
|---|----------|-----------------|----------------|------------------|----------------|------------------|------|----------|-----------------|----------------|------------------|----------------|------------------|---|
| 1 | 157.1084 | 79.0578         | 140.0818       | 70.5446          |                |                  | R    |          |                 |                |                  |                |                  | 9 |
| 2 | 270.1925 | 135.5999        | 253.1659       | 127.0866         |                |                  | L    | 830.5346 | 415.7709        | 813.5080       | 407.2577         | 812.5240       | 406.7656         | 8 |
| 3 | 369.2609 | 185.1341        | 352.2343       | 176.6208         |                |                  | V    | 717.4505 | 359.2289        | 700.4240       | 350.7156         | 699.4400       | 350.2236         | 7 |
| 4 | 470.3085 | 235.6579        | 453.2820       | 227.1446         | 452.2980       | 226.6526         | T    | 618.3821 | 309.6947        | 601.3556       | 301.1814         | 600.3715       | 300.6894         | 6 |
| 5 | 571.3562 | 286.1817        | 554.3297       | 277.6685         | 553.3457       | 277.1765         | T    | 517.3344 | 259.1709        | 500.3079       | 250.6576         | 499.3239       | 250.1656         | 5 |
| 6 | 628.3777 | 314.6925        | 611.3511       | 306.1792         | 610.3671       | 305.6872         | G    | 416.2867 | 208.6470        | 399.2602       | 200.1337         |                |                  | 4 |
| 7 | 727.4461 | 364.2267        | 710.4196       | 355.7134         | 709.4355       | 355.2214         | V    | 359.2653 | 180.1363        | 342.2387       | 171.6230         |                |                  | 3 |
| 8 | 840.5302 | 420.7687        | 823.5036       | 412.2554         | 822.5196       | 411.7634         | L    | 260.1969 | 130.6021        | 243.1703       | 122.0888         |                |                  | 2 |
| 9 |          |                 |                |                  |                |                  | K    | 147.1128 | 74.0600         | 130.0863       | 65.5468          |                |                  | 1 |

# H1.0 ( H1°): LVTTGVLK(pr)QTK(pr)GVGASGSFR

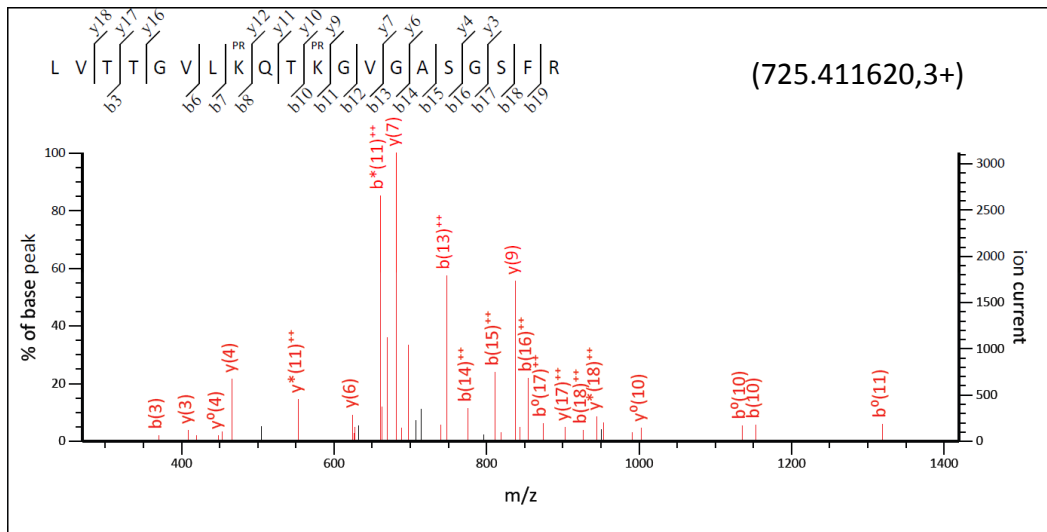

Monoisotopic mass of neutral peptide Mr(calc): 2173.2107

Fixed modifications: Carbamidomethyl (C), Propionyl (N-term) (apply to specified residues or termini only)

Variable modifications:

K8 : Propionyl (K)

K11 : Propionyl (K)

Ions Score: 64 Expect: 0.0001

Matches : 41/206 fragment ions using 40 most intense peaks ([help](#))

| #  | b                | b <sup>++</sup> | b <sup>*</sup> | b <sup>**</sup> | b <sup>0</sup>   | b <sup>0++</sup> | Seq. | y               | y <sup>++</sup>  | y <sup>*</sup> | y <sup>**</sup> | y <sup>0</sup>   | y <sup>0++</sup> | #  |
|----|------------------|-----------------|----------------|-----------------|------------------|------------------|------|-----------------|------------------|----------------|-----------------|------------------|------------------|----|
| 1  | 170.1176         | 85.5624         |                |                 |                  |                  | L    |                 |                  |                |                 |                  |                  | 20 |
| 2  | 269.1860         | 135.0966        |                |                 |                  |                  | V    | 2005.1077       | <b>1003.0575</b> | 1988.0811      | 994.5442        | 1987.0971        | 994.0522         | 19 |
| 3  | <b>370.2336</b>  | 185.6205        |                |                 | 352.2231         | 176.6152         | T    | 1906.0393       | <b>953.5233</b>  | 1889.0127      | <b>945.0100</b> | 1888.0287        | <b>944.5180</b>  | 18 |
| 4  | 471.2813         | 236.1443        |                |                 | <b>453.2708</b>  | 227.1390         | T    | 1804.9916       | <b>902.9994</b>  | 1787.9650      | 894.4862        | 1786.9810        | 893.9941         | 17 |
| 5  | 528.3028         | 264.6550        |                |                 | 510.2922         | 255.6498         | G    | 1703.9439       | 852.4756         | 1686.9173      | <b>843.9623</b> | 1685.9333        | <b>843.4703</b>  | 16 |
| 6  | <b>627.3712</b>  | 314.1892        |                |                 | 609.3606         | 305.1840         | V    | 1646.9224       | 823.9649         | 1629.8959      | 815.4516        | 1628.9119        | 814.9596         | 15 |
| 7  | <b>740.4553</b>  | 370.7313        |                |                 | 722.4447         | 361.7260         | L    | 1547.8540       | 774.4306         | 1530.8275      | 765.9174        | 1529.8435        | 765.4254         | 14 |
| 8  | 924.5764         | 462.7919        | 907.5499       | 454.2786        | 906.5659         | <b>453.7866</b>  | K    | 1434.7700       | 717.8886         | 1417.7434      | 709.3753        | 1416.7594        | 708.8833         | 13 |
| 9  | 1052.6350        | 526.8212        | 1035.6085      | 518.3079        | 1034.6245        | 517.8159         | Q    | 1250.6488       | <b>625.8280</b>  | 1233.6222      | 617.3148        | 1232.6382        | 616.8227         | 12 |
| 10 | <b>1153.6827</b> | 577.3450        | 1136.6562      | 568.8317        | <b>1135.6721</b> | 568.3397         | T    | 1122.5902       | 561.7987         | 1105.5637      | <b>553.2855</b> | 1104.5796        | <b>552.7935</b>  | 11 |
| 11 | 1337.8039        | <b>669.4056</b> | 1320.7773      | <b>660.8923</b> | <b>1319.7933</b> | <b>660.4003</b>  | K    | 1021.5425       | 511.2749         | 1004.5160      | 502.7616        | <b>1003.5320</b> | 502.2696         | 10 |
| 12 | 1394.8253        | <b>697.9163</b> | 1377.7988      | 689.4030        | 1376.8148        | <b>688.9110</b>  | G    | <b>837.4213</b> | <b>419.2143</b>  | 820.3948       | 410.7010        | <b>819.4108</b>  | 410.2090         | 9  |
| 13 | 1493.8938        | <b>747.4505</b> | 1476.8672      | 738.9372        | 1475.8832        | 738.4452         | V    | 780.3999        | 390.7036         | 763.3733       | 382.1903        | 762.3893         | 381.6983         | 8  |
| 14 | 1550.9152        | <b>775.9613</b> | 1533.8887      | 767.4480        | 1532.9047        | 766.9560         | G    | <b>681.3315</b> | 341.1694         | 664.3049       | 332.6561        | <b>663.3209</b>  | 332.1641         | 7  |
| 15 | 1621.9523        | <b>811.4798</b> | 1604.9258      | 802.9665        | 1603.9418        | 802.4745         | A    | <b>624.3100</b> | 312.6586         | 607.2835       | 304.1454        | 606.2994         | 303.6534         | 6  |
| 16 | 1708.9844        | <b>854.9958</b> | 1691.9578      | 846.4825        | 1690.9738        | 845.9905         | S    | <b>553.2729</b> | 277.1401         | 536.2463       | 268.6268        | 535.2623         | 268.1348         | 5  |
| 17 | 1766.0058        | 883.5066        | 1748.9793      | 874.9933        | 1747.9953        | <b>874.5013</b>  | G    | <b>466.2409</b> | 233.6241         | 449.2143       | 225.1108        | <b>448.2303</b>  | 224.6188         | 4  |
| 18 | 1853.0379        | <b>927.0226</b> | 1836.0113      | 918.5093        | 1835.0273        | 918.0173         | S    | <b>409.2194</b> | 205.1133         | 392.1928       | 196.6001        | 391.2088         | 196.1081         | 3  |
| 19 | 2000.1063        | 1000.5568       | 1983.0797      | 992.0435        | 1982.0957        | <b>991.5515</b>  | F    | 322.1874        | 161.5973         | 305.1608       | 153.0840        |                  |                  | 2  |
| 20 |                  |                 |                |                 |                  |                  | R    | 175.1190        | 88.0631          | 158.0924       | 79.5498         |                  |                  | 1  |

# H1.0 ( H1°): LAK(pr)GDEPK(pr)R

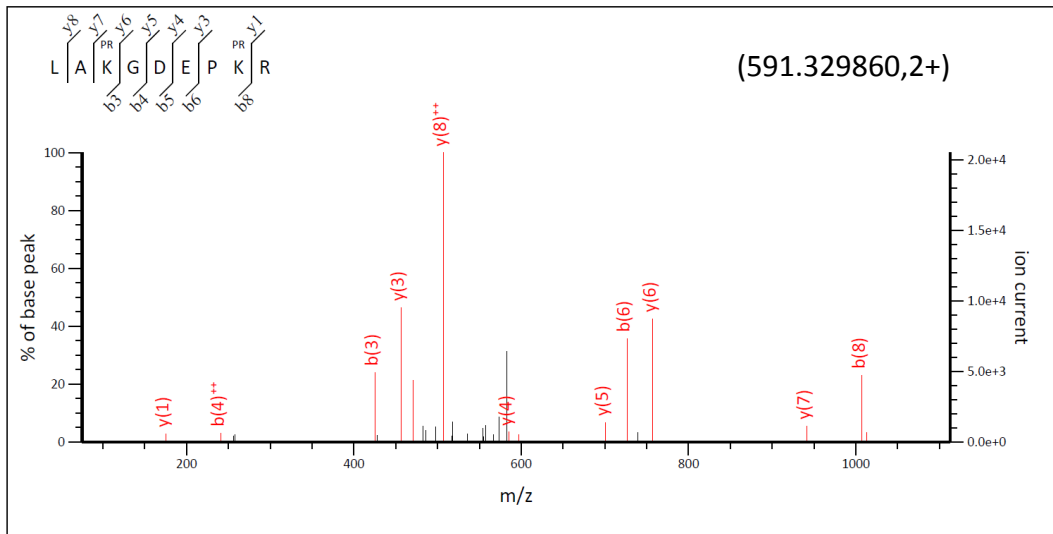

Monoisotopic mass of neutral peptide Mr(calc): 1180.6452

Fixed modifications: Carbamidomethyl (C), Propionyl (N-term) (apply to specified residues or termini only)

Variable modifications:

K3 : Propionyl (K)

K8 : Propionyl (K)

Ions Score: 65 Expect: 6.2e-05

Matches : 15/78 fragment ions using 18 most intense peaks ([help](#))

| # | b                | b <sup>++</sup> | b <sup>*</sup> | b <sup>+++</sup> | b <sup>0</sup> | b <sup>0++</sup> | Seq. | y                | y <sup>++</sup> | y <sup>*</sup> | y <sup>+++</sup> | y <sup>0</sup> | y <sup>0++</sup> | # |
|---|------------------|-----------------|----------------|------------------|----------------|------------------|------|------------------|-----------------|----------------|------------------|----------------|------------------|---|
| 1 | 170.1176         | 85.5624         |                |                  |                |                  | L    |                  |                 |                |                  |                |                  | 9 |
| 2 | <b>241.1547</b>  | 121.0810        |                |                  |                |                  | A    | <b>1012.3422</b> | <b>506.7747</b> | 995.5156       | 498.2615         | 994.5316       | 497.7694         | 8 |
| 3 | <b>425.2758</b>  | 213.1416        | 408.2493       | 204.6283         |                |                  | K    | <b>941.5051</b>  | <b>471.2562</b> | 924.4785       | 462.7429         | 923.4945       | 462.2509         | 7 |
| 4 | 482.2973         | <b>241.6523</b> | 465.2708       | 233.1390         |                |                  | G    | <b>757.3839</b>  | 379.1956        | 740.3573       | 370.6823         | 739.3733       | 370.1903         | 6 |
| 5 | <b>597.3243</b>  | 299.1658        | 580.2977       | 290.6525         | 579.3137       | 290.1605         | D    | <b>700.3624</b>  | 350.6849        | 683.3359       | 342.1716         | 682.3519       | 341.6796         | 5 |
| 6 | <b>726.3668</b>  | 363.6871        | 709.3403       | 355.1738         | 708.3563       | 354.6818         | E    | <b>585.3355</b>  | 293.1714        | 568.3089       | 284.6581         | 567.3249       | 284.1661         | 4 |
| 7 | 823.4196         | 412.2134        | 806.3931       | 403.7002         | 805.4090       | 403.2082         | P    | <b>456.2929</b>  | 228.6501        | 439.2663       | 220.1368         |                |                  | 3 |
| 8 | <b>1007.5408</b> | 504.2740        | 990.5142       | 495.7608         | 989.5302       | 495.2688         | K    | 359.2401         | 180.1237        | 342.2136       | 171.6104         |                |                  | 2 |
| 9 |                  |                 |                |                  |                |                  | R    | <b>175.1190</b>  | 88.0631         | 158.0924       | 79.5498          |                |                  | 1 |

# H1.0 ( H1°): **TENSTAPAAK(pr)PK(pr)R**

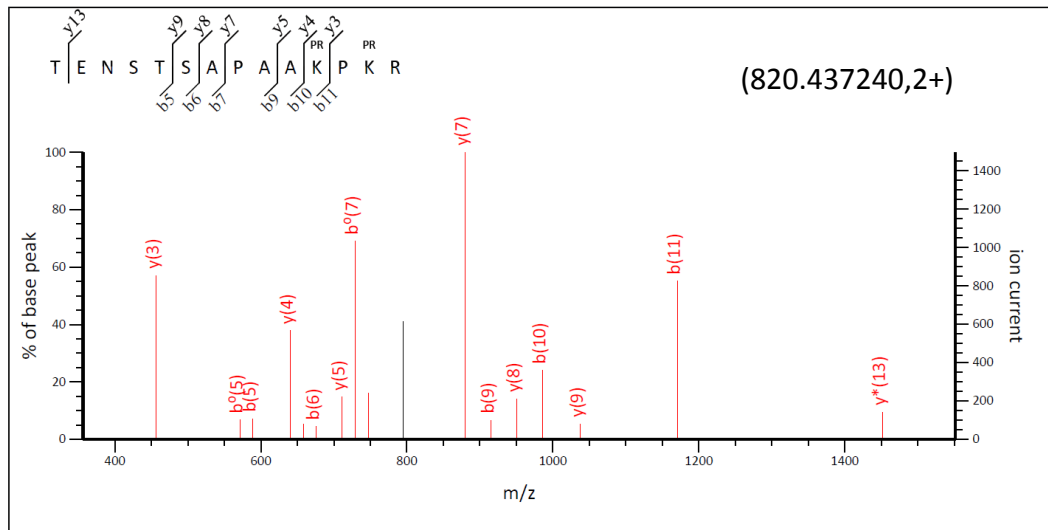

Monoisotopic mass of neutral peptide  $M_r(\text{calc})$ : 1624.8420  
 Fixed modifications: Carbamidomethyl (C), Propionyl (N-term) (apply to specified residues or termini only)  
 Variable modifications:  
 K11 : Propionyl (K)  
 K13 : Propionyl (K)  
 Ions Score: 74 Expect: 1.3e-05  
 Matches : 17/136 fragment ions using 17 most intense peaks ([help](#))

| #  | b         | b <sup>++</sup> | b*        | b <sup>***</sup> | b <sup>0</sup> | b <sup>0++</sup> | Seq. | y         | y <sup>++</sup> | y*        | y <sup>***</sup> | y <sup>0</sup> | y <sup>0++</sup> | #  |
|----|-----------|-----------------|-----------|------------------|----------------|------------------|------|-----------|-----------------|-----------|------------------|----------------|------------------|----|
| 1  | 158.0812  | 79.5442         |           |                  | 140.0706       | 70.5389          | T    |           |                 |           |                  |                |                  | 14 |
| 2  | 287.1238  | 144.0655        |           |                  | 269.1132       | 135.0602         | E    | 1468.7754 | 734.8914        | 1451.7489 | 726.3781         | 1450.7649      | 725.8861         | 13 |
| 3  | 401.1667  | 201.0870        | 384.1401  | 192.5737         | 383.1561       | 192.0817         | N    | 1339.7328 | 670.3701        | 1322.7063 | 661.8568         | 1321.7223      | 661.3648         | 12 |
| 4  | 488.1987  | 244.6030        | 471.1722  | 236.0897         | 470.1882       | 235.5977         | S    | 1225.6899 | 613.3486        | 1208.6634 | 604.8353         | 1207.6793      | 604.3433         | 11 |
| 5  | 589.2464  | 295.1268        | 572.2198  | 286.6136         | 571.2358       | 286.1216         | T    | 1138.6579 | 569.8326        | 1121.6313 | 561.3193         | 1120.6473      | 560.8273         | 10 |
| 6  | 676.2784  | 338.6429        | 659.2519  | 330.1296         | 658.2679       | 329.6376         | S    | 1037.6102 | 519.3087        | 1020.5837 | 510.7955         | 1019.5996      | 510.3035         | 9  |
| 7  | 747.3155  | 374.1614        | 730.2890  | 365.6481         | 729.3050       | 365.1561         | A    | 950.5782  | 475.7927        | 933.5516  | 467.2795         |                |                  | 8  |
| 8  | 844.3683  | 422.6878        | 827.3418  | 414.1745         | 826.3577       | 413.6825         | P    | 879.5411  | 440.2742        | 862.5145  | 431.7609         |                |                  | 7  |
| 9  | 915.4054  | 458.2063        | 898.3789  | 449.6931         | 897.3949       | 449.2011         | A    | 782.4883  | 391.7478        | 765.4618  | 383.2345         |                |                  | 6  |
| 10 | 986.4425  | 493.7249        | 969.4160  | 485.2116         | 968.4320       | 484.7196         | A    | 711.4512  | 356.2292        | 694.4246  | 347.7160         |                |                  | 5  |
| 11 | 1170.5637 | 585.7855        | 1153.5372 | 577.2722         | 1152.5531      | 576.7802         | K    | 640.4141  | 320.7107        | 623.3875  | 312.1974         |                |                  | 4  |
| 12 | 1267.6165 | 634.3119        | 1250.5899 | 625.7986         | 1249.6059      | 625.3066         | P    | 456.2929  | 228.6501        | 439.2663  | 220.1368         |                |                  | 3  |
| 13 | 1451.7377 | 726.3725        | 1434.7111 | 717.8592         | 1433.7271      | 717.3672         | K    | 359.2401  | 180.1237        | 342.2136  | 171.6104         |                |                  | 2  |
| 14 |           |                 |           |                  |                |                  | R    | 175.1190  | 88.0631         | 158.0924  | 79.5498          |                |                  | 1  |

TS H1.7 (H1T2, HANP1): **QTIQKPALDNAPSIQKGK**

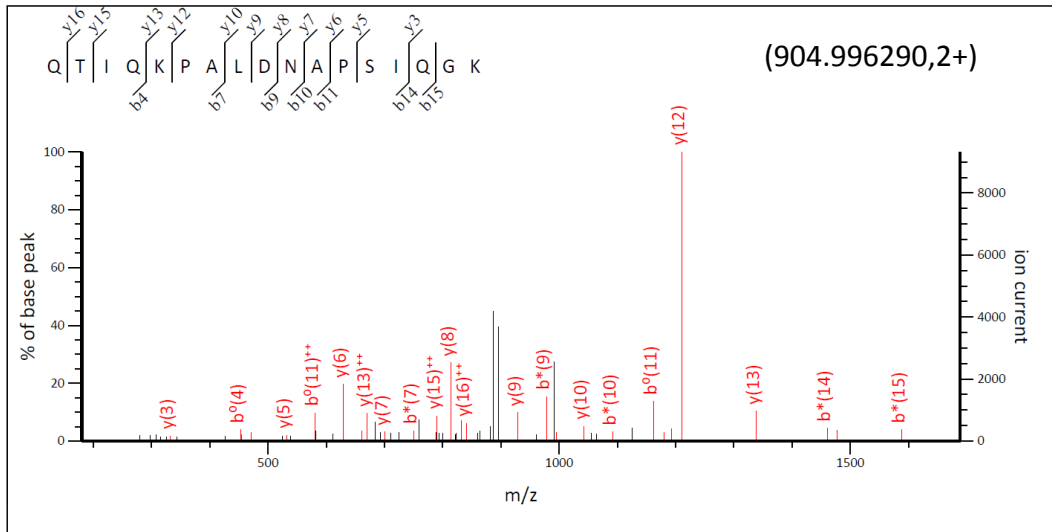

Monoisotopic mass of neutral peptide Mr(calc): 1807.9792  
 Fixed modifications: Carbamidomethyl (C) (apply to specified residues or termini only)  
 Ions Score: 63 Expect: 9.8e-06  
 Matches : 32/182 fragment ions using 41 most intense peaks ([help](#))

| #  | b                | b <sup>++</sup> | b <sup>*</sup>   | b <sup>*++</sup> | b <sup>0</sup>   | b <sup>0++</sup> | Seq. | y                | y <sup>++</sup> | y <sup>*</sup> | y <sup>*++</sup> | y <sup>0</sup>   | y <sup>0++</sup> | #  |
|----|------------------|-----------------|------------------|------------------|------------------|------------------|------|------------------|-----------------|----------------|------------------|------------------|------------------|----|
| 1  | 129.0659         | 65.0366         | 112.0393         | 56.5233          |                  |                  | Q    |                  |                 |                |                  |                  |                  | 17 |
| 2  | 230.1135         | 115.5604        | 213.0870         | 107.0471         | 212.1030         | 106.5551         | T    | 1680.9279        | <b>840.9676</b> | 1663.9014      | <b>832.4543</b>  | 1662.9173        | <b>831.9623</b>  | 16 |
| 3  | 343.1976         | 172.1024        | 326.1710         | 163.5892         | 325.1870         | 163.0972         | I    | 1579.8802        | <b>790.4438</b> | 1562.8537      | 781.9305         | 1561.8697        | 781.4385         | 15 |
| 4  | <b>471.2562</b>  | 236.1317        | <b>454.2296</b>  | 227.6185         | <b>453.2456</b>  | 227.1264         | Q    | 1466.7962        | 733.9017        | 1449.7696      | 725.3884         | 1448.7856        | 724.8964         | 14 |
| 5  | 599.3511         | 300.1792        | 582.3246         | 291.6659         | <b>581.3406</b>  | 291.1739         | K    | <b>1338.7376</b> | <b>669.8724</b> | 1321.7110      | <b>661.3592</b>  | 1320.7270        | <b>660.8672</b>  | 13 |
| 6  | 696.4039         | 348.7056        | 679.3774         | 340.1923         | 678.3933         | 339.7003         | P    | <b>1210.6426</b> | 605.8250        | 1193.6161      | 597.3117         | <b>1192.6321</b> | 596.8197         | 12 |
| 7  | 767.4410         | 384.2241        | <b>750.4145</b>  | 375.7109         | 749.4305         | 375.2189         | A    | 1113.5899        | 557.2986        | 1096.5633      | 548.7853         | 1095.5793        | 548.2933         | 11 |
| 8  | 880.5251         | 440.7662        | 863.4985         | 432.2529         | 862.5145         | 431.7609         | L    | <b>1042.5528</b> | 521.7800        | 1025.5262      | 513.2667         | 1024.5422        | 512.7747         | 10 |
| 9  | <b>995.5520</b>  | 498.2796        | <b>978.5255</b>  | 489.7664         | 977.5415         | 489.2744         | D    | <b>929.4687</b>  | 465.2380        | 912.4421       | 456.7247         | 911.4581         | 456.2327         | 9  |
| 10 | 1109.5950        | 555.3011        | <b>1092.5684</b> | 546.7878         | 1091.5844        | 546.2958         | N    | <b>814.4417</b>  | 407.7245        | 797.4152       | 399.2112         | 796.4312         | 398.7192         | 8  |
| 11 | <b>1180.6321</b> | 590.8197        | 1163.6055        | 582.3064         | <b>1162.6215</b> | <b>581.8144</b>  | A    | <b>700.3988</b>  | 350.7030        | 683.3723       | 342.1898         | 682.3883         | 341.6978         | 7  |
| 12 | 1277.6848        | 639.3461        | 1260.6583        | 630.8328         | 1259.6743        | 630.3408         | P    | <b>629.3617</b>  | 315.1845        | 612.3352       | 306.6712         | 611.3511         | 306.1792         | 6  |
| 13 | 1364.7169        | 682.8621        | 1347.6903        | 674.3488         | 1346.7063        | 673.8568         | S    | <b>532.3089</b>  | 266.6581        | 515.2824       | 258.1448         | 514.2984         | 257.6528         | 5  |
| 14 | <b>1477.8009</b> | 739.4041        | <b>1460.7744</b> | 730.8908         | 1459.7904        | 730.3988         | I    | 445.2769         | 223.1421        | 428.2504       | 214.6288         |                  |                  | 4  |
| 15 | 1605.8595        | 803.4334        | <b>1588.8329</b> | 794.9201         | 1587.8489        | 794.4281         | Q    | <b>332.1928</b>  | 166.6001        | 315.1663       | 158.0868         |                  |                  | 3  |
| 16 | 1662.8810        | <b>831.9441</b> | 1645.8544        | 823.4308         | 1644.8704        | 822.9388         | G    | 204.1343         | 102.5708        | 187.1077       | 94.0575          |                  |                  | 2  |
| 17 |                  |                 |                  |                  |                  |                  | K    | 147.1128         | 74.0600         | 130.0863       | 65.5468          |                  |                  | 1  |

TS H1.7 (H1T2, HANP1): **VSGSDAAGYFR**

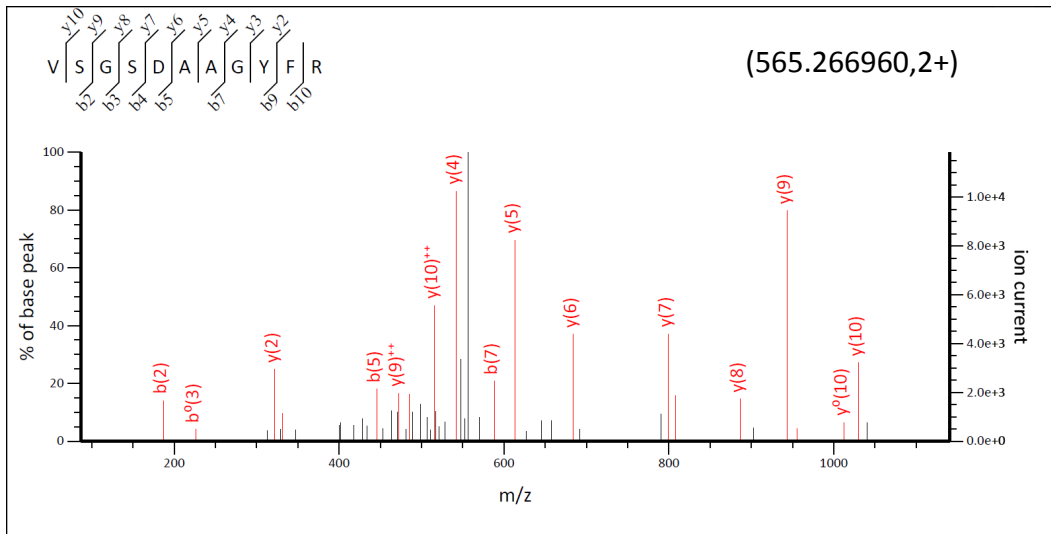

Monoisotopic mass of neutral peptide Mr(calc): 1128.5200

Fixed modifications: Carbamidomethyl (C) (apply to specified residues or termini only)

Ions Score: 89 Expect: 2.3e-08

Matches : 19/86 fragment ions using 24 most intense peaks ([help](#))

| #  | b               | b <sup>++</sup> | b <sup>0</sup>  | b <sup>0++</sup> | Seq. | y                | y <sup>++</sup> | y*        | y <sup>+++</sup> | y <sup>0</sup>   | y <sup>0++</sup> | #  |
|----|-----------------|-----------------|-----------------|------------------|------|------------------|-----------------|-----------|------------------|------------------|------------------|----|
| 1  | 100.0757        | 50.5415         |                 |                  | V    |                  |                 |           |                  |                  |                  | 11 |
| 2  | <b>187.1077</b> | 94.0575         | 169.0972        | 85.0522          | S    | <b>1030.4589</b> | <b>515.7331</b> | 1013.4323 | 507.2198         | <b>1012.4483</b> | 506.7278         | 10 |
| 3  | 244.1292        | 122.5682        | <b>226.1186</b> | 113.5629         | G    | <b>943.4268</b>  | <b>472.2170</b> | 926.4003  | 463.7038         | 925.4163         | 463.2118         | 9  |
| 4  | <b>331.1612</b> | 166.0842        | 313.1506        | 157.0790         | S    | <b>886.4054</b>  | 443.7063        | 869.3788  | 435.1930         | 868.3948         | 434.7010         | 8  |
| 5  | <b>446.1882</b> | 223.5977        | 428.1776        | 214.5924         | D    | <b>799.3733</b>  | 400.1903        | 782.3468  | 391.6770         | 781.3628         | 391.1850         | 7  |
| 6  | 517.2253        | 259.1163        | 499.2147        | 250.1110         | A    | <b>684.3464</b>  | 342.6768        | 667.3198  | 334.1636         |                  |                  | 6  |
| 7  | <b>588.2624</b> | 294.6348        | 570.2518        | 285.6295         | A    | <b>613.3093</b>  | 307.1583        | 596.2827  | 298.6450         |                  |                  | 5  |
| 8  | 645.2838        | 323.1456        | 627.2733        | 314.1403         | G    | <b>542.2722</b>  | 271.6397        | 525.2456  | 263.1264         |                  |                  | 4  |
| 9  | <b>808.3472</b> | 404.6772        | 790.3366        | 395.6719         | Y    | <b>485.2507</b>  | 243.1290        | 468.2241  | 234.6157         |                  |                  | 3  |
| 10 | <b>955.4156</b> | 478.2114        | 937.4050        | 469.2061         | F    | <b>322.1874</b>  | 161.5973        | 305.1608  | 153.0840         |                  |                  | 2  |
| 11 |                 |                 |                 |                  | R    | 175.1190         | 88.0631         | 158.0924  | 79.5498          |                  |                  | 1  |

TS H1.7 (H1T2, HANP1): **AIAGHQHLTDALK**

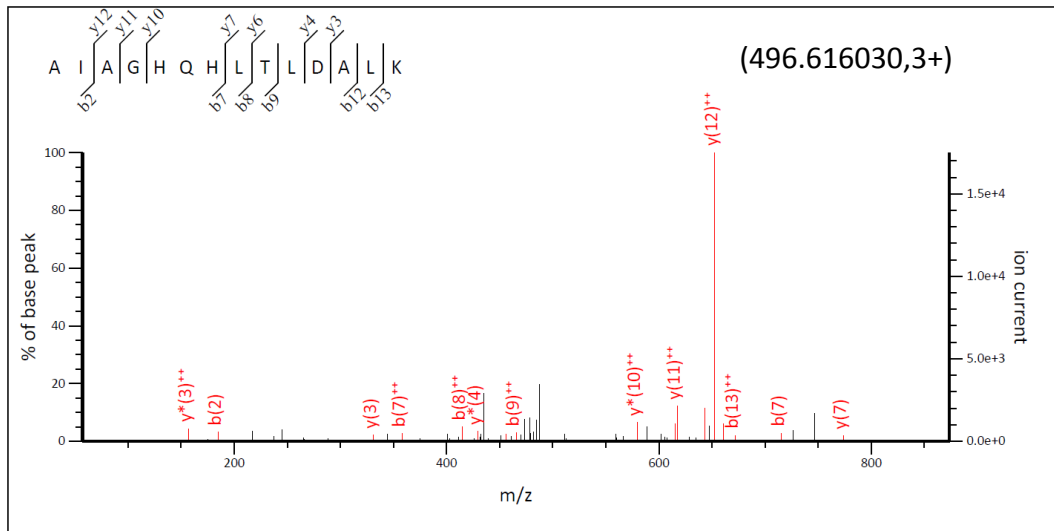

Monoisotopic mass of neutral peptide Mr(calc): 1486.8256  
 Fixed modifications: Carbamidomethyl (C) (apply to specified residues or termini only)  
 Ions Score: 41 Expect: 0.011  
 Matches : 25/124 fragment ions using 35 most intense peaks ([help](#))

| #  | b               | b <sup>++</sup> | b*        | b <sup>+++</sup> | b <sup>0</sup> | b <sup>0++</sup> | Seq. | y               | y <sup>++</sup> | y*              | y <sup>+++</sup> | y <sup>0</sup> | y <sup>0++</sup> | #  |
|----|-----------------|-----------------|-----------|------------------|----------------|------------------|------|-----------------|-----------------|-----------------|------------------|----------------|------------------|----|
| 1  | 72.0444         | 36.5258         |           |                  |                |                  | A    |                 |                 |                 |                  |                |                  | 14 |
| 2  | <b>185.1285</b> | 93.0679         |           |                  |                |                  | I    | 1416.7958       | 708.9015        | 1399.7692       | 700.3883         | 1398.7852      | 699.8962         | 13 |
| 3  | 256.1656        | 128.5864        |           |                  |                |                  | A    | 1303.7117       | <b>652.3595</b> | 1286.6852       | <b>643.8462</b>  | 1285.7011      | <b>643.3542</b>  | 12 |
| 4  | 313.1870        | <b>157.0972</b> |           |                  |                |                  | G    | 1232.6746       | <b>616.8409</b> | 1215.6480       | 608.3277         | 1214.6640      | 607.8357         | 11 |
| 5  | 450.2459        | 225.6266        |           |                  |                |                  | H    | 1175.6531       | 588.3302        | 1158.6266       | <b>579.8169</b>  | 1157.6426      | <b>579.3249</b>  | 10 |
| 6  | 578.3045        | 289.6559        | 561.2780  | 281.1426         |                |                  | Q    | 1038.5942       | 519.8007        | 1021.5677       | 511.2875         | 1020.5837      | 510.7955         | 9  |
| 7  | <b>715.3634</b> | <b>358.1854</b> | 698.3369  | 349.6721         |                |                  | H    | 910.5356        | <b>455.7715</b> | 893.5091        | 447.2582         | 892.5251       | 446.7662         | 8  |
| 8  | 828.4475        | <b>414.7274</b> | 811.4209  | 406.2141         |                |                  | L    | <b>773.4767</b> | 387.2420        | 756.4502        | 378.7287         | 755.4662       | 378.2367         | 7  |
| 9  | 929.4952        | <b>465.2512</b> | 912.4686  | <b>456.7380</b>  | 911.4846       | <b>456.2459</b>  | T    | <b>660.3927</b> | <b>330.7000</b> | <b>643.3661</b> | 322.1867         | 642.3821       | 321.6947         | 6  |
| 10 | 1042.5792       | 521.7933        | 1025.5527 | 513.2800         | 1024.5687      | 512.7880         | L    | 559.3450        | 280.1761        | 542.3184        | 271.6629         | 541.3344       | 271.1708         | 5  |
| 11 | 1157.6062       | <b>579.3067</b> | 1140.5796 | 570.7935         | 1139.5956      | 570.3014         | D    | 446.2609        | 223.6341        | <b>429.2344</b> | 215.1208         | 428.2504       | 214.6288         | 4  |
| 12 | 1228.6433       | <b>614.8253</b> | 1211.6167 | 606.3120         | 1210.6327      | 605.8200         | A    | <b>331.2340</b> | 166.1206        | 314.2074        | <b>157.6074</b>  |                |                  | 3  |
| 13 | 1341.7274       | <b>671.3673</b> | 1324.7008 | 662.8540         | 1323.7168      | 662.3620         | L    | 260.1969        | 130.6021        | 243.1703        | 122.0888         |                |                  | 2  |
| 14 |                 |                 |           |                  |                |                  | K    | 147.1128        | 74.0600         | 130.0863        | 65.5468          |                |                  | 1  |

TS H1.7 (H1T2, HANP1): **ELGNAGYEV**R

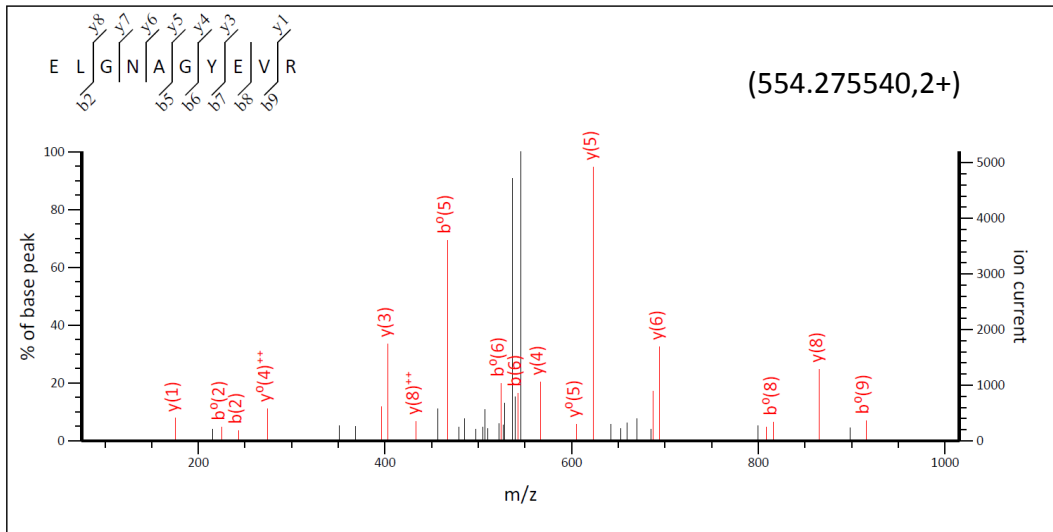

Monoisotopic mass of neutral peptide  $M_r(\text{calc})$ : 1106.5356

Fixed modifications: Carbamidomethyl (C) (apply to specified residues or termini only)

Ions Score: 64 Expect: 1.5e-05

Matches : 24/98 fragment ions using 31 most intense peaks ([help](#))

| #  | b               | b <sup>++</sup> | b <sup>*</sup> | b <sup>*++</sup> | b <sup>0</sup>  | b <sup>0++</sup> | Seq. | y               | y <sup>++</sup> | y <sup>*</sup> | y <sup>*++</sup> | y <sup>0</sup>  | y <sup>0++</sup> | #  |
|----|-----------------|-----------------|----------------|------------------|-----------------|------------------|------|-----------------|-----------------|----------------|------------------|-----------------|------------------|----|
| 1  | 130.0499        | 65.5286         |                |                  | 112.0393        | 56.5233          | E    |                 |                 |                |                  |                 |                  | 10 |
| 2  | <b>243.1339</b> | 122.0706        |                |                  | <b>225.1234</b> | 113.0653         | L    | 978.5003        | 489.7538        | 961.4738       | 481.2405         | 960.4898        | 480.7485         | 9  |
| 3  | 300.1554        | 150.5813        |                |                  | 282.1448        | 141.5761         | G    | <b>865.4163</b> | <b>433.2118</b> | 848.3897       | 424.6985         | 847.4057        | 424.2065         | 8  |
| 4  | 414.1983        | 207.6028        | 397.1718       | 199.0895         | <b>396.1878</b> | 198.5975         | N    | <b>808.3948</b> | 404.7010        | 791.3682       | <b>396.1878</b>  | 790.3842        | <b>395.6958</b>  | 7  |
| 5  | 485.2354        | <b>243.1214</b> | 468.2089       | 234.6081         | <b>467.2249</b> | 234.1161         | A    | <b>694.3519</b> | 347.6796        | 677.3253       | 339.1663         | 676.3413        | 338.6743         | 6  |
| 6  | <b>542.2569</b> | 271.6321        | 525.2304       | 263.1188         | <b>524.2463</b> | 262.6268         | G    | <b>623.3148</b> | 312.1610        | 606.2882       | 303.6477         | <b>605.3042</b> | 303.1557         | 5  |
| 7  | 705.3202        | 353.1638        | 688.2937       | 344.6505         | <b>687.3097</b> | 344.1585         | Y    | <b>566.2933</b> | 283.6503        | 549.2667       | 275.1370         | 548.2827        | <b>274.6450</b>  | 4  |
| 8  | 834.3628        | 417.6851        | 817.3363       | 409.1718         | <b>816.3523</b> | 408.6798         | E    | <b>403.2300</b> | 202.1186        | 386.2034       | 193.6053         | 385.2194        | 193.1133         | 3  |
| 9  | 933.4312        | <b>467.2193</b> | 916.4047       | 458.7060         | <b>915.4207</b> | 458.2140         | V    | <b>274.1874</b> | 137.5973        | 257.1608       | 129.0840         |                 |                  | 2  |
| 10 |                 |                 |                |                  |                 |                  | R    | <b>175.1190</b> | 88.0631         | 158.0924       | 79.5498          |                 |                  | 1  |



TS H1.7 (H1T2, HANP1): **AEAVQPSGESQGAELTIQIQQAER**

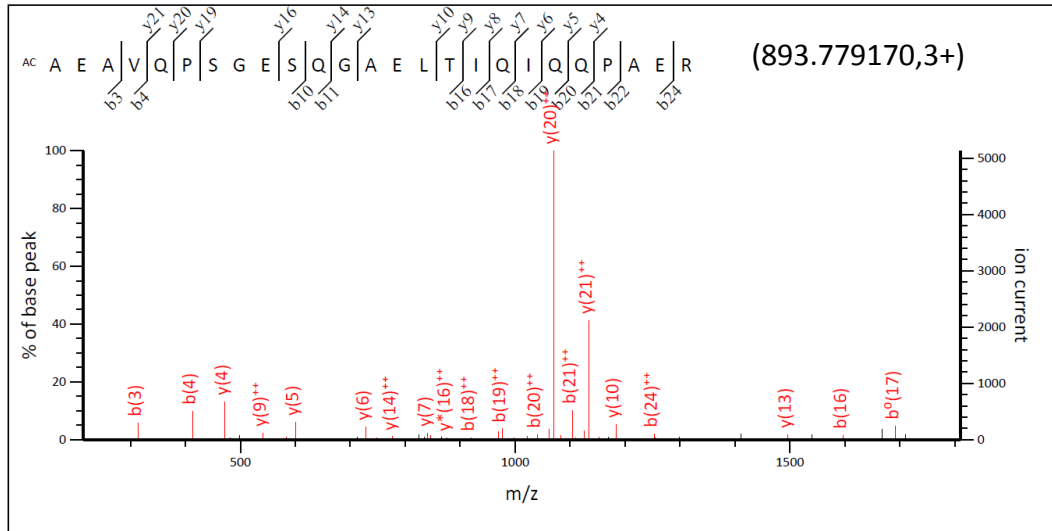

**Monoisotopic mass of neutral peptide Mr(calc):** 2678.3147  
**Fixed modifications:** Carbamidomethyl (C), Propionyl (N-term) (apply to specified residues or termini only)  
**Variable modifications:**  
**N-term:** Acetyl (Protein N-term)  
**Ions Score:** 60 **Expect:** 8e-05  
**Matches:** 47/276 fragment ions using 46 most intense peaks ([help](#))

| #  | b                | b <sup>++</sup>  | b <sup>*</sup>   | b <sup>*++</sup> | b <sup>0</sup>   | b <sup>0++</sup> | Seq. | y                | y <sup>++</sup>  | y <sup>*</sup>  | y <sup>*++</sup> | y <sup>0</sup> | y <sup>0++</sup> | #  |
|----|------------------|------------------|------------------|------------------|------------------|------------------|------|------------------|------------------|-----------------|------------------|----------------|------------------|----|
| 1  | 114.0550         | 57.5311          |                  |                  |                  |                  | A    |                  |                  |                 |                  |                |                  | 25 |
| 2  | 243.0975         | 122.0524         |                  |                  | 225.0870         | 113.0471         | E    | 2566.2744        | 1283.6408        | 2549.2478       | 1275.1275        | 2548.2638      | 1274.6355        | 24 |
| 3  | <b>314.1347</b>  | 157.5710         |                  |                  | 296.1241         | 148.5657         | A    | 2437.2318        | 1219.1195        | 2420.2052       | 1210.6062        | 2419.2212      | 1210.1142        | 23 |
| 4  | <b>413.2031</b>  | 207.1052         |                  |                  | 395.1925         | 198.0999         | V    | 2366.1946        | <b>1183.6010</b> | 2349.1681       | 1175.0877        | 2348.1841      | 1174.5957        | 22 |
| 5  | <b>541.2617</b>  | 271.1345         | 524.2351         | 262.6212         | 523.2511         | 262.1292         | Q    | 2267.1262        | <b>1134.0668</b> | 2250.0997       | <b>1125.5535</b> | 2249.1157      | <b>1125.0615</b> | 21 |
| 6  | 638.3144         | 319.6608         | 621.2879         | 311.1476         | 620.3039         | 310.6556         | P    | 2139.0677        | <b>1070.0375</b> | 2122.0411       | <b>1061.5242</b> | 2121.0571      | <b>1061.0322</b> | 20 |
| 7  | 725.3464         | 363.1769         | 708.3199         | 354.6636         | 707.3359         | 354.1716         | S    | 2042.0149        | <b>1021.5111</b> | 2024.9883       | 1012.9978        | 2024.0043      | 1012.5058        | 19 |
| 8  | 782.3679         | 391.6876         | 765.3414         | 383.1743         | 764.3573         | 382.6823         | G    | 1954.9829        | 977.9951         | 1937.9563       | <b>969.4818</b>  | 1936.9723      | <b>968.9898</b>  | 18 |
| 9  | 911.4105         | 456.2089         | 894.3840         | 447.6956         | 893.3999         | 447.2036         | E    | 1897.9614        | 949.4843         | 1880.9348       | 940.9711         | 1879.9508      | 940.4791         | 17 |
| 10 | <b>998.4425</b>  | 499.7249         | 981.4160         | 491.2116         | 980.4320         | 490.7196         | S    | 1768.9188        | 884.9630         | 1751.8923       | <b>876.4498</b>  | 1750.9082      | <b>875.9578</b>  | 16 |
| 11 | 1126.5011        | 563.7542         | <b>1109.4746</b> | 555.2409         | 1108.4905        | 554.7489         | Q    | 1681.8868        | <b>841.4470</b>  | 1664.8602       | 832.9338         | 1663.8762      | 832.4417         | 15 |
| 12 | <b>1183.5226</b> | 592.2649         | 1166.4960        | <b>583.7517</b>  | 1165.5120        | <b>583.2596</b>  | G    | 1553.8282        | <b>777.4177</b>  | 1536.8016       | 768.9045         | 1535.8176      | 768.4125         | 14 |
| 13 | 1254.5597        | 627.7835         | 1237.5331        | 619.2702         | 1236.5491        | 618.7782         | A    | <b>1496.8067</b> | <b>748.9070</b>  | 1479.7802       | 740.3937         | 1478.7962      | 739.9017         | 13 |
| 14 | 1383.6023        | 692.3048         | 1366.5757        | 683.7915         | 1365.5917        | 683.2995         | E    | 1425.7696        | 713.3884         | 1408.7431       | 704.8752         | 1407.7591      | 704.3832         | 12 |
| 15 | <b>1496.6863</b> | <b>748.8468</b>  | 1479.6598        | 740.3335         | 1478.6758        | 739.8415         | L    | 1296.7270        | 648.8672         | 1279.7005       | 640.3539         | 1278.7165      | 639.8619         | 11 |
| 16 | <b>1597.7340</b> | 799.3706         | 1580.7075        | 790.8574         | 1579.7235        | 790.3654         | T    | <b>1183.6430</b> | 592.3251         | 1166.6164       | <b>583.8118</b>  | 1165.6324      | <b>583.3198</b>  | 10 |
| 17 | 1710.8181        | 855.9127         | 1693.7915        | 847.3994         | <b>1692.8075</b> | <b>846.9074</b>  | I    | <b>1082.5953</b> | <b>541.8013</b>  | 1065.5687       | 533.2880         | 1064.5847      | 532.7960         | 9  |
| 18 | 1838.8767        | <b>919.9420</b>  | 1821.8501        | 911.4287         | 1820.8661        | 910.9367         | Q    | <b>969.5112</b>  | 485.2592         | 952.4847        | 476.7460         | 951.5007       | 476.2540         | 8  |
| 19 | 1951.9607        | <b>976.4840</b>  | 1934.9342        | 967.9707         | 1933.9502        | 967.4787         | I    | <b>841.4526</b>  | 421.2300         | 824.4261        | <b>412.7167</b>  | 823.4421       | 412.2247         | 7  |
| 20 | 2080.0193        | <b>1040.5133</b> | 2062.9928        | 1032.0000        | 2062.0087        | 1031.5080        | Q    | <b>728.3686</b>  | 364.6879         | 711.3420        | 356.1747         | 710.3580       | 355.6826         | 6  |
| 21 | 2208.0779        | <b>1104.5426</b> | 2191.0513        | 1096.0293        | 2190.0673        | 1095.5373        | Q    | <b>600.3100</b>  | 300.6586         | <b>583.2835</b> | 292.1454         | 582.2994       | 291.6534         | 5  |
| 22 | 2305.1306        | <b>1153.0690</b> | 2288.1041        | 1144.5557        | 2287.1201        | 1144.0637        | P    | <b>472.2514</b>  | 236.6293         | 455.2249        | 228.1161         | 454.2409       | 227.6241         | 4  |
| 23 | 2376.1678        | 1188.5875        | 2359.1412        | 1180.0742        | 2358.1572        | 1179.5822        | A    | 375.1987         | 188.1030         | 358.1721        | 179.5897         | 357.1881       | 179.0977         | 3  |
| 24 | 2505.2104        | <b>1253.1088</b> | 2488.1838        | 1244.5955        | 2487.1998        | 1244.1035        | E    | 304.1615         | 152.5844         | 287.1350        | 144.0711         | 286.1510       | 143.5791         | 2  |
| 25 |                  |                  |                  |                  |                  |                  | R    | 175.1190         | 88.0631          | 158.0924        | 79.5498          |                |                  | 1  |

TS H1.7 (H1T2, HANP1): **SSAKSSAKSSTR**

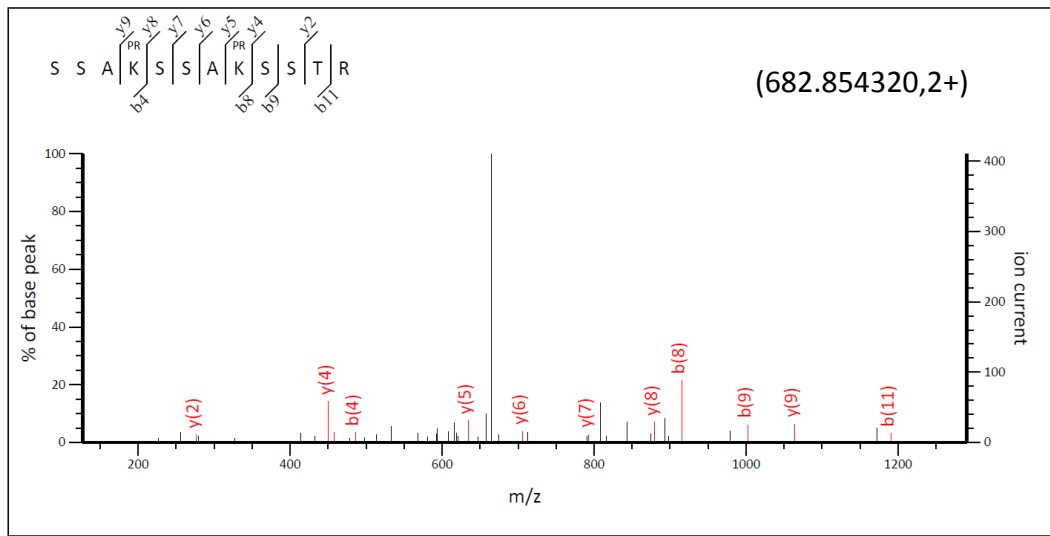

Monoisotopic mass of neutral peptide Mr(calc): 1363.6943  
 Fixed modifications: Carbamidomethyl (C), Propionyl (N-term) (apply to specified residues or termini only)  
 Variable modifications:  
 K4 : Propionyl (K)  
 K8 : Propionyl (K)  
 Ions Score: 33 Expect: 0.026  
 Matches : 12/124 fragment ions using 31 most intense peaks ([help](#))

| #  | b                | b <sup>++</sup> | b <sup>*</sup> | b <sup>+++</sup> | b <sup>0</sup> | b <sup>0++</sup> | Seq. | y                | y <sup>++</sup> | y <sup>*</sup> | y <sup>+++</sup> | y <sup>0</sup> | y <sup>0++</sup> | #  |
|----|------------------|-----------------|----------------|------------------|----------------|------------------|------|------------------|-----------------|----------------|------------------|----------------|------------------|----|
| 1  | 144.0655         | 72.5364         |                |                  | 126.0550       | 63.5311          | S    |                  |                 |                |                  |                |                  | 12 |
| 2  | 231.0975         | 116.0524        |                |                  | 213.0870       | 107.0471         | S    | 1221.6434        | 611.3253        | 1204.6168      | 602.8120         | 1203.6328      | 602.3200         | 11 |
| 3  | 302.1347         | 151.5710        |                |                  | 284.1241       | 142.5657         | A    | 1134.6113        | 567.8093        | 1117.5848      | 559.2960         | 1116.6008      | 558.8040         | 10 |
| 4  | <b>486.2558</b>  | 243.6316        | 469.2293       | 235.1183         | 468.2453       | 234.6263         | K    | <b>1063.5742</b> | 532.2907        | 1046.5477      | 523.7775         | 1045.5636      | 523.2855         | 9  |
| 5  | 573.2879         | 287.1476        | 556.2613       | 278.6343         | 555.2773       | 278.1423         | S    | <b>879.4530</b>  | 440.2302        | 862.4265       | 431.7169         | 861.4425       | 431.2249         | 8  |
| 6  | 660.3199         | 330.6636        | 643.2933       | 322.1503         | 642.3093       | 321.6583         | S    | <b>792.4210</b>  | 396.7141        | 775.3945       | 388.2009         | 774.4104       | 387.7089         | 7  |
| 7  | 731.3570         | 366.1821        | 714.3305       | 357.6689         | 713.3464       | 357.1769         | A    | <b>705.3890</b>  | 353.1981        | 688.3624       | 344.6849         | 687.3784       | 344.1928         | 6  |
| 8  | <b>915.4782</b>  | <b>458.2427</b> | 898.4516       | 449.7295         | 897.4676       | 449.2374         | K    | <b>634.3519</b>  | 317.6796        | 617.3253       | 309.1663         | 616.3413       | 308.6743         | 5  |
| 9  | <b>1002.5102</b> | 501.7587        | 985.4837       | 493.2455         | 984.4996       | 492.7535         | S    | <b>450.2307</b>  | 225.6190        | 433.2041       | 217.1057         | 432.2201       | 216.6137         | 4  |
| 10 | 1089.5422        | 545.2748        | 1072.5157      | 536.7615         | 1071.5317      | 536.2695         | S    | 363.1987         | 182.1030        | 346.1721       | 173.5897         | 345.1881       | 173.0977         | 3  |
| 11 | <b>1190.5899</b> | 595.7986        | 1173.5634      | 587.2853         | 1172.5794      | 586.7933         | T    | <b>276.1666</b>  | 138.5870        | 259.1401       | 130.0737         | 258.1561       | 129.5817         | 2  |
| 12 |                  |                 |                |                  |                |                  | R    | 175.1190         | 88.0631         | 158.0924       | 79.5498          |                |                  | 1  |
